1 **Single Cell Analysis Reveals Multi-faceted miR-375**

2 **Regulation of the Intestinal Crypt**

3

4 Michael T. Shanahan<sup>1,†</sup>, Matt Kanke<sup>1,†</sup>, Ajeet P. Singh<sup>1</sup>, Jonathan W. Villanueva<sup>1</sup>, Adrian J.

5 McNairn<sup>1</sup>, Oyebola O. Oyesola<sup>2</sup>, Alessandro Bonfini<sup>3</sup>, Yu-Han Hung<sup>1</sup>, Breanna Sheahan<sup>4</sup>,

6 Jordana C. Bloom<sup>1</sup>, Rebecca L. Cubitt<sup>1</sup>, Ennessa G. Curry<sup>5</sup>, Wendy A. Pitman<sup>1</sup>, Vera D.

7 Rinaldi<sup>1</sup>, Christopher M. Dekaney<sup>4</sup>, Shengli Ding<sup>6</sup>, Bailey C.E. Peck<sup>7</sup>, John C. Schimenti<sup>1</sup>, Lukas

8 E. Dow<sup>8</sup>, Nicolas Buchon<sup>3</sup>, Elia D. Tait-Wojno<sup>2</sup>, and Praveen Sethupathy<sup>1\*</sup>

9

10 *<sup>1</sup>Department of Biomedical Sciences, College of Veterinary Medicine, Cornell University,*

11 *Ithaca, NY, 14853, USA*

12 *<sup>2</sup>Baker Institute, College of Veterinary Medicine, Cornell University, Ithaca, NY, 14853, USA*

13 *<sup>3</sup>Cornell Institute of Host-Microbe Interactions and Disease, Department of Entomology, Cornell*

14 *University, Ithaca, NY, 14853, USA*

15 *<sup>4</sup>Department of Molecular Biomedical Sciences, North Carolina State University, Raleigh, NC,*

16 *27607, USA*

17 *<sup>5</sup>Department of Genetics, School of Medicine, University of North Carolina, Chapel Hill, NC,*

18 *27599, USA*

19 *<sup>6</sup>Department of Cell Biology and Physiology, School of Medicine, University of North Carolina,*

20 *Chapel Hill, NC, 27599, USA*

21 *<sup>7</sup>Department of Surgery, School of Medicine, University of Michigan, Ann Arbor, MI, 48109,*

22 *USA*

23 <sup>8</sup>*Sandra and Edward Meyer Cancer Center, Department of Medicine, Weill Cornell Medicine,*  
24 *Cornell University, New York, NY, 10065, USA*

25

26 †*These authors contributed equally.*

27 \* *Corresponding author*

28

29 *Correspondence: praveens@cornell.edu, pr46@cornell.edu*

30

31

32

33

34

35

36

37

38

39

40

41

42

43

44

45

## 46 **Summary**

47 The role of individual miRNAs in small intestinal (SI) epithelial homeostasis is under-explored.  
48 In this study, we discovered that miR-375 is among the most enriched miRNAs in intestinal  
49 crypts and stem cells (ISCs), especially facultative ISCs. We then showed by multiple  
50 manipulations, including CRISPR/Cas9 editing, that miR-375 is strongly suppressed by Wnt-  
51 signaling. Single-cell RNA-seq analysis of SI crypt-enriched cells from miR-375 knockout (375-  
52 KO) mice revealed elevated numbers of tuft cells and increased expression of pro-proliferative  
53 genes in ISCs. Accordingly, the genetic loss of miR-375 promoted resistance to helminth  
54 infection and enhanced the regenerative response to irradiation. The conserved effects of miR-  
55 375 were confirmed by gain-of-function studies in *Drosophila* midgut stem cells *in vivo*.  
56 Moreover, functional experiments in enteroids uncovered a regulatory relationship between miR-  
57 375 and Yap1 that controls cell survival. Finally, analysis of mouse model and clinical data  
58 revealed an inverse association between miR-375 levels and intestinal tumor development.

## 59 60 **Highlights**

- 61 • miR-375 is one of the most enriched miRNAs in ISCs, especially facultative ISCs.
- 62 • miR-375 modifies tuft cell abundance and pro-proliferative gene expression in ISCs.
- 63 • Loss of miR-375 in mice enhances the host response to helminth infection and crypt  
64 regeneration.
- 65 • Mouse and human intestinal cancer are associated with reduced miR-375 expression.

## 66 67 **eTOC Blurb**

68 Sethupathy and colleagues show that miR-375 is a Wnt-responsive, ISC-enriched miRNA that  
69 serves as a brake on intestinal crypt proliferation. They also show that miR-375 modulates tuft

70 cell abundance and pro-proliferative gene expression in ISCs, that miR-375 loss enhances the  
71 host response to helminth infection as well as crypt regeneration post-irradiation, and its reduced  
72 expression is associated with intestinal cancer.

73

## 74 **Introduction**

75

76 The small intestinal epithelium is a highly proliferative and regenerative tissue compartment of  
77 the intestinal mucosa. Actively-cycling intestinal stem cells (ISCs) located at the base of the  
78 epithelial crypts drive homeostatic renewal (3-5 days) of the epithelial lining (Barker, 2014),  
79 whereas facultative stem cells are induced upon injury to regenerate the epithelium (Ayyaz et al.,  
80 2019; Richmond et al., 2016). ISCs give rise to several different specialized cell types, which  
81 carry out diverse functions, including nutrient absorption and protection against pathogenic  
82 infection. To ensure the integrity of the epithelial lining and maintain proper cell lineage  
83 allocation, the proliferative capacity of actively-cycling ISCs, as well as injury-inducible  
84 facultative ISCs, must be tightly regulated by various cell-autonomous signaling pathways  
85 (Henning and von Furstenberg, 2016).

86

87 The Wnt signaling pathway is especially critical for determining ISC self-renewal and  
88 proliferative capacity (He et al., 2004). In the stem cells of other organ systems, regulatory  
89 RNAs (such as microRNAs) have been shown to play significant roles in modulating Wnt and  
90 other related signal transduction pathways (Peng et al., 2016; Zhang et al., 2019). However, the  
91 roles of most regulatory RNAs in the control of intestinal crypt behavior remain to be  
92 investigated.

93

94 MicroRNAs (miRNAs) are small, ~22nt regulatory RNAs that serve as fine-tuners of gene  
95 expression at the post-transcriptional level (Bartel, 2018; Gebert and MacRae, 2019). Their  
96 activity is critical in a wide array of biological processes, including growth and differentiation  
97 (Ivey and Srivastava, 2010). Over the past several years, it has been increasingly recognized that  
98 miRNAs impact the structure and function of the small intestine. McKenna and colleagues  
99 showed that gut-specific deletion of *Dicer1*, a critical processing enzyme of miRNAs, produces  
100 profound effects on intestinal architecture and allocation of mature cell types (McKenna et al.,  
101 2010). We previously reported that miRNAs in Sox9-Low jejunal epithelial cells, which are  
102 partially enriched for ISCs, are highly sensitive to microbes (Peck et al., 2017a). We also  
103 recently reported on a specific miRNA, miR-7, which is enriched along the enteroendocrine  
104 lineage trajectory and regulates intestinal epithelial proliferation (Singh et al., 2020). Others  
105 have shown that microRNAs such as miR-31, miR-34a, and miR-34b/c regulate mouse ISC  
106 proliferation (Bu et al., 2016; Jiang and Hermeking, 2017; Tian et al., 2017). Moreover, the  
107 evolutionary conserved role of microRNAs in regulating ISC activity is observed in the ability of  
108 let-7, miR-305, and miR-263a to modulate ISC division in *Drosophila melanogaster* (Chen et  
109 al., 2015; Foronda et al., 2014; Kim et al., 2017). Despite these advances, which miRNAs are  
110 enriched in mouse actively-cycling or facultative ISCs, and if/how they alter the cellular  
111 landscape and function of the intestinal crypt, remains unknown.

112

113 In this study, using several different reporter mice and fluorescence activated cell sorting (FACS)  
114 methods, we identify miR-375 as the most enriched miRNA in crypts (and especially facultative  
115 ISCs) relative to villus cells. Single cell RNA-seq reveals that genetic loss of miR-375 results in

116 the elevation of Wnt signaling within ISCs and an increase in the number of tuft cells.  
117 Accordingly, we show that 375-KO mice exhibit significant reduction in worm burden after  
118 *Heligmosomoides polygyrus* infection and in the regenerative response to whole-body  
119 irradiation. The effects of miR-375 on intestinal epithelial survival and proliferation are further  
120 confirmed by functional experiments in *Drosophila* midgut stem cells *in vivo* and murine  
121 enteroids *ex vivo*, the latter of which also reveal a regulatory relationship between miR-375 and  
122 *Yap1*. Finally, analysis of data generated from mouse models and human samples reveals an  
123 association between miR-375 levels and intestinal tumor development.

124

## 125 **Results**

126

### 127 ***MiR-375 is the most enriched miRNA in intestinal stem cells***

128

129 ISCs, transit-amplifying progenitors, and cells that contribute to the stem cell niche are enriched  
130 in intestinal crypts relative to villi (Barker, 2014). First, we profiled miRNAs, by small RNA  
131 sequencing (small RNA-seq), in mouse jejunal crypts and villi (fractions validated by RT-qPCR,  
132 **Fig. S1A,B**) separately and identified seven miRNAs that are significantly enriched in the crypts  
133 (fold change > 2.5, P-value < 0.05) (**Fig. 1A, Table S1**). To determine the extent to which ISCs  
134 contribute to the apparent crypt enrichment of these seven miRNAs, we performed small RNA-  
135 seq on three different sorted populations of crypt-resident cells that have previously been shown  
136 to exhibit stem cell features: the crypt-based columnar Lgr5-High cells (Barker et al., 2007)  
137 (validated by RT-qPCR, **Fig. S1C**), Sox9-Low cells (Formeister et al., 2009) (validated by RT-  
138 qPCR, **Fig. S1D**), and Cd24-Low cells (von Furstenberg et al., 2011). Bioinformatic analysis of

139 the small RNA-seq data revealed that 14 miRNAs are shared among the top 20 most highly  
140 expressed miRNAs in each of the three cell populations (**Fig. 1B, Table S2**). Among these 14,  
141 only miR-375 is also among the seven crypt-enriched miRNAs (**Fig. 1A, Table S1**), which we  
142 further validated by quantitative real time qPCR (RT-qPCR) (**Fig. 1C**). Moreover, miR-375 is  
143 the most highly enriched miRNA in crypt-resident Lgr5-High ISCs compared to cells over-  
144 represented in villi (Sox9-Neg) (**Fig. 1D**). It is also the most highly enriched in crypt-resident  
145 Sox9-Low ISCs relative to Sox9-Neg (**Fig. 1E**). Other crypt-based cells include slowly-cycling  
146 Lgr5-negative facultative ISCs, (lower side population; LSP) (Dekaney et al., 2005) (validated  
147 by RT-qPCR, **Fig. S1E**). Although these cells are more slowly cycling than Lgr5+ ISCs at  
148 baseline, they have the capacity to revert to a more proliferative state in response to injury  
149 (Ayyaz et al., 2019; Richmond et al., 2016). We sorted and sequenced LSP cells and found that  
150 miR-375 is even more enriched in this population relative to Lgr5-High ISCs and upper side  
151 population (USP) actively-cycling stem cells (**Fig. 1F**), respectively. Taken together, these data  
152 indicate that miR-375 is over-represented in crypts, expressed in actively-cycling ISCs, and even  
153 more highly expressed in facultative ISCs.

154

### 155 *miR-375 expression is responsive to Wnt signaling in intestinal epithelial cells*

156

157 Wnt signaling plays a prominent role in maintaining ISC survival and proliferative capacity  
158 (Flanagan et al., 2018). The high expression of miR-375 in Lgr5+ ISCs suggests that either miR-  
159 375 promotes or serves as a break on Wnt signaling pathways. Because miR-375 expression is  
160 even higher in facultative ISCs (**Fig. 1F**), which exhibit reduced Wnt signaling activity relative

161 to Lgr5<sup>+</sup> ISCs (Tao et al., 2015), we hypothesize that miR-375 and Wnt signaling are mutually  
162 suppressive.

163

164 To determine whether miR-375 is suppressed by Wnt signaling, we assessed miR-375 expression  
165 under various conditions in which Wnt signaling is perturbed. First, we considered the  
166 physiological condition of aging in which Wnt signaling in ISCs is reduced (Nalapareddy et al.,  
167 2017). Comparing expression in intestinal crypts of >1-year old mice relative to those derived  
168 from mice 5 months or younger, we observed a nearly 2-fold increase in mature miR-375 levels  
169 (**Fig. 1G**). Second, exposure of mouse jejunal enteroids to 1  $\mu$ M IWP2, a porcupine inhibitor  
170 and Wnt antagonist (Mo et al., 2013), significantly increased expression of miR-375 relative to  
171 the mock condition (**Fig. 1H**). Finally, we used CRISPR/Cas9 to generate enteroids with a Wnt-  
172 activating mutation in APC (APCmut) (Dow et al., 2015) and performed small RNA sequencing  
173 analysis. We found that miR-375 is among the few miRNAs that are significantly suppressed in  
174 APCmut enteroids relative to unmutated control enteroid cells (**Fig. 1I, Table S3**). This finding  
175 was validated by RT-qPCR in APCmut enteroids as well as enteroids with a Wnt-activating  $\beta$ -  
176 catenin mutation ( $\beta$ -Cat-mut), also generated by CRISPR/Cas9 (**Fig. 1J**). Taken together, the  
177 results of these analyses indicate that miR-375 expression is controlled by the Wnt signaling  
178 pathway.

179

180 *miR-375 deficiency enhances small intestinal tuft cell abundance and enhances resistance to*  
181 *Heligmosomoides polygyrus helminth infection*

182



183 The enrichment of miR-375 expression in intestinal stem cells and its responsiveness to Wnt  
184 signaling suggested that miR-375 may play a role in affecting the allocation and/or proliferation  
185 of various intestinal crypt cell types. To test this, we performed single cell RNA-seq (scRNA-  
186 seq) on jejunal crypt cells from 12-month-old WT mice and mice with a germ-line deletion for  
187 miR-375 (375-KO) (see Methods & Materials). Whole-body disruption of the miR-375 gene in  
188 375-KO mice relative to WT was confirmed by tail genomic DNA genotyping (**Fig. S2A**) and by  
189 RT-qPCR data of miR-375 expression in jejunal enteroids derived from 375-KO mice relative to  
190 WT (**Fig. S2B**). In our analysis of the scRNA-seq data, we were able to identify several distinct  
191 clusters of cell populations (**Fig. 2A**) and unambiguously identify each of them as a well-  
192 established intestinal epithelial cell type based on the expression of distinguishing marker genes  
193 (**Fig. 2B**) as defined in a seminal scRNA-seq study of intestinal crypts by Haber and coworkers  
194 (Haber et al., 2017). In terms of the relative abundance of different cell types, the most striking  
195 result was a robust increase in tuft cells in 375-KO compared to WT (**Fig. 2C**). Gene expression  
196 analysis confirmed that several tuft cell marker genes including *Pou2f3*, *Gfi1b*, *Ascl2*, *Dclk1*,  
197 *Trpm5*, and *Rgs13* are elevated in 375-KO mice relative to WT (**Fig. 2D**). One of the best-  
198 characterized functions of intestinal tuft cells is to mediate the host anti-helminth response  
199 (Gerbe et al., 2016). Therefore, we hypothesized that the loss of miR-375 may reduce infectious  
200 burden. To test this hypothesis, both WT and 375-KO mice were infected with the helminth  
201 *Heligmosomoides polygyrus*. After 14 days of inoculation, although 375-KO mice did not  
202 display increased numbers of total immune cells (**Fig. S3A**) within the mesenteric lymph node,  
203 they did exhibit significantly increased numbers of eosinophils (**Fig. 2E**), which is a well-  
204 established marker of a robust host response to helminth infection. Consistent with this result, we

205 found that 375-KO mice exhibited a significant decrease in intestinal worm burden (**Fig. 2F**),  
206 indicative of enhanced resistance to helminth infection.

207

208 *miR-375 deficiency enhances Wnt signaling in intestinal stem cells and promotes the*  
209 *regenerative response to irradiation*

210

211 Besides elevating tuft cell abundance, the scRNA-seq analysis of 375-KO and WT mice  
212 indicated that loss of miR-375 alters pathways in ISCs as well. Network analysis of the genes  
213 up-regulated in ISCs in 375-KO vs. WT showed enrichment of several transcription factors  
214 associated with the Wnt signaling pathway (**Fig. 3A**). Consistent with this result, we found that  
215 Wnt signaling target genes, including *Ccnd2*, *Cd44*, *Ascl2*, *Myc*, *Cldn2*, and *Trim65* are  
216 significantly up-regulated in ISCs from 375-KO mice compared to WT (**Fig. 3B,C**). These data  
217 suggested that miR-375 deficiency promotes Wnt signaling, which may elevate the proliferative  
218 capacity of the intestinal epithelium. The loss of miR-375 did not result in alteration of either  
219 mid-jejunal crypt depth (**Fig. S4A,B**) or the number of proliferating PH3<sup>+</sup> mid-jejunal crypt cells  
220 (**Fig. S4C,D**) under unchallenged, baseline conditions. We hypothesized that the effect of miR-  
221 375 loss may be more pronounced in response to injury. To test this hypothesis, we evaluated  
222 the intestinal crypt response to whole-body irradiation in 375-KO mice compared to WT. Initial  
223 assessment of changes in mid-jejunal crypt depth of WT mice suggested that whole-body  
224 irradiation of 10 Gy results in peak crypt regeneration around 3 days post-irradiation (**Fig. S5A**).  
225 Therefore, we evaluated mid-jejunal crypt depth of WT and 375-KO mice during a period of  
226 increasing crypt regeneration at 1 day and 2.5 days post-irradiation (p.i.). Accelerated deepening  
227 of 375-KO mid-jejunal crypts in response to irradiation relative to WT indicated that reduced

228 miR-375 expression potentiates intestinal regeneration induced by radiation injury (**Fig. 3D,E**).  
229 To determine whether other external challenges produce a similar phenotype, we subjected WT  
230 and 375-KO mice to a high fat diet for 16 weeks. There was no significant difference in weight  
231 gain between WT and 375-KO mice (**Fig. S4E**). Furthermore, both groups of mice manifested  
232 similar mid-jejunal crypt depths (**Fig. S4F,G**), indicating that the functional relevance of miR-  
233 375 to the regulation of crypt depth is specific to the regenerative response to irradiation and not  
234 generalizable to any stress condition.

235

### 236 *Loss of miR-375 leads to increased intestinal epithelial proliferation*

237

238 We next sought to assess the function of miR-375 considering the intestinal epithelium alone.  
239 Specifically, we isolated jejunal crypts from 375-KO and WT mice and established enteroids *ex*  
240 *vivo*. The enteroids from 375-KO mice exhibited a significantly greater budding index relative  
241 to WT (**Fig. 4A,B**). 375-KO jejunal enteroids also displayed elevated survival compared with  
242 WT jejunal enteroids, an effect that was abrogated by inhibition of Wnt signaling (**Fig. 4C,D**).

243

244 We repeated the *ex vivo* study using enteroids from WT mice treated with either a locked nucleic  
245 acid (LNA) inhibitor of miR-375 (LNA-375) or LNA-scramble control (LNA-scr). Treatment  
246 with LNA-375 led to a ~1,000-fold loss in the levels of miR-375 (**Fig. S6A**). Though loss of  
247 miR-375 did not affect enteroid size (**Fig. S6B,C**), it did lead to significantly greater budding  
248 (**Fig. 4E,F**) and proliferation as measured by PH3+ cells/enteroid (**Fig. 4G,H**).

249

250 Given the extensive conservation of miR-375 across many species (**Fig. 5A**), we next evaluated  
251 the effect of miR-375 overexpression *in vivo* in the midgut epithelium of *Drosophila*  
252 *melanogaster*, a well-established model for gut stem cell response to stress and  
253 infection (Buchon et al., 2009). First, we performed overexpression of miR-375 using the  
254 lineage tracing system *esg<sup>F/O</sup>*. In this system, GFP and miR-375 are both expressed in *esg*<sup>+</sup> ISCs  
255 and progenitor cells, as well as all direct progeny. We found that miR-375 reduces the  
256 generation of new GFP<sup>+</sup> cells (**Fig. 5B**), suggesting that it suppresses ISC/progenitor cell  
257 activity. We next performed over-expression of miR-375 using *esg<sup>TS</sup>* (*esgGal4, Gal80<sup>TS</sup>>UAS-*  
258 *miR-375*), in which GFP and miR-375 are expressed only in *esg*<sup>+</sup> ISCs and progenitor cells. We  
259 found that miR-375 did not alter the number of GFP<sup>+</sup> ISCs and progenitor cells in basal  
260 homeostatic conditions (**Fig. 5C**). However, midguts under these basal conditions have a limited  
261 amount of proliferative activity; therefore, we repeated the experiment of miR-375 over-  
262 expression in ISCs and progenitor cells (*esgGal4, Gal80<sup>TS</sup>>UAS-miR-375*) under stress  
263 conditions of infection with *Erwinia carotovora carotovora* 15 (*Ecc15*), a fly pathogen that  
264 induces high levels of proliferation (Buchon et al., 2010). We found that miR-375 robustly  
265 decreases the number of GFP<sup>+</sup> cells (**Fig. 5D**), suggestive of reduced cycling. Consistent with  
266 this finding, we also showed that over-expression of miR-375 in ISCs and progenitor cells led to  
267 a significant reduction in the total number of PH3<sup>+</sup> proliferating cells (**Fig. 5E**). These results  
268 demonstrate that miR-375 is a strong cell-autonomous regulator of ISC proliferation and attest to  
269 the broad species conservation of the effect of miR-375 on intestinal epithelial proliferation.  
270  
271 In full, these data demonstrate that both genetic deletion (permanent) and pharmacologic  
272 suppression (transient) of miR-375 promotes intestinal epithelial growth phenotypes in murine

273 enteroids *ex vivo* and suggest a function for miR-375 in controlling stress-induced proliferation  
274 in the *Drosophila* midgut *in vivo*.

275

276 ***miR-375 control of enteroid growth is mediated in part by regulation of the Yap1 pathway***

277

278 To identify candidate mechanisms by which miR-375 exerts its effects on intestinal epithelial  
279 proliferation, we mined our previously published small RNA-seq and RNA-seq data in Sox9-  
280 Low stem cells under diverse conditions (chow diet, high-fat diet, germ-free, and microbially-  
281 conventionalized) that variably influence the proliferative state of intestinal crypts (Beyaz et al.,  
282 2016; Peck et al., 2017a). Analysis of these data revealed that the expression of miR-375 and the  
283 Hippo signaling pathway factor *Yap1* (Yu et al., 2015), a target of miR-375 (Liu et al., 2010), are  
284 very strongly inversely correlated (Pearson's  $r = -0.808$ ) (**Fig. 6A**). We then treated enteroids  
285 established from 375-KO and WT mice with either 2  $\mu\text{M}$  or 5  $\mu\text{M}$  Yap1 inhibitor (verteporfin)  
286 (Liu-Chittenden et al., 2012) and compared to the untreated condition (mock). As expected,  
287 verteporfin exerted a dose-dependent suppressive effect (mock vs. 2  $\mu\text{M}$  vs. 3  $\mu\text{M}$ ) on the Yap1  
288 target gene *Ctgf* (**Fig. S7A**) (Huntoon et al., 2010). Budding efficiency did not appear to be  
289 affected by Yap1 inhibition (**Fig. 6B,C**). However, Yap1 inhibition did reduce enteroid survival  
290 and, notably, this effect at 2  $\mu\text{M}$  verteporfin was almost completely rescued by the loss of miR-  
291 375, but not at 5  $\mu\text{M}$  verteporfin (**Fig. 6D,E**). In effect, miR-375 deficiency compensates for the  
292 anti-survival effect of moderate, but not strong, inhibition of Yap1.

293

294 ***Intestinal tumors are strongly associated with diminished miR-375 expression***

295

296 Elevated Wnt (Schneikert and Behrens, 2006) and Yap1 signaling (Zhao et al., 2011) are both  
297 associated with the development of intestinal cancers. Therefore, we hypothesized that the  
298 development of intestinal tumors may be associated with reduced expression of miR-375. Small  
299 intestinal polyps collected from mice with Wnt activating mutations of APC (APCmut),  
300 including APCmin and APCq1405x mutations, exhibit decreased levels of miR-375 relative to  
301 WT mice (**Fig. S8A**). To determine whether human colon tumors show a similar association, we  
302 interrogated the The Cancer Genome Atlas (TCGA) database to compare microRNA levels in  
303 primary colon adenocarcinoma tumors to non-tumor colon samples. We found that miR-375 was  
304 the most highly expressed miRNA in non-tumor colon tissue that is significantly downregulated  
305 (>5-fold) in tumor relative to non-tumor tissue (**Fig. 7A,B**). This pattern of miR-375 expression  
306 is preserved when comparing only the matched tumor and non-tumor samples from the same  
307 individual (**Fig. 7C**). Notably, integrative analysis with TCGA RNA-seq data revealed that,  
308 among miR-375 target genes down-regulated in colon adenocarcinoma samples, *YAP1* is the  
309 most inversely correlated gene with miR-375 expression (**Fig. 7D**).

310

311 Taken together, the data presented in this study, which features crypt scRNA-seq, as well as  
312 cross-species functional studies, provide a comprehensive view of the role of a miRNA in the  
313 intestinal crypt. Important functions of miR-375 revealed in this work include the control of tuft  
314 cell abundance and response to helminth *Heligmosomoides polygyrus* infection as well as Wnt-  
315 signaling in ISCs and regenerative response to irradiation. A working model of miR-375  
316 expression and function is shown in **Fig. 7E**.

317

318 **Discussion**

319

320 It is recognized that miRNAs affect the structural and functional properties of the small intestinal  
321 epithelium (McKenna et al., 2010; Peck et al., 2017a; Singh et al., 2020). Previously, we have  
322 shown that an intestinal epithelial cell population that is partially enriched for ISCs is also  
323 enriched for several miRNAs that are responsive to microbes (Peck et al., 2017a). In this report,  
324 we have: (1) identified 14 miRNAs that are very highly expressed in mouse jejunal ISCs  
325 including the most enriched miRNA miR-375; (2) shown that the expression of miR-375 is  
326 strongly suppressed by Wnt signaling; (3) found that genetic loss of miR-375 results in an  
327 elevation of tuft cell numbers and in the significant reduction of helminth worm burden after  
328 *Heligmosomoides polygyrus* infection; (4) determined that miR-375 deficiency promotes the  
329 Wnt-signaling pathway in ISCs and enhances the intestinal epithelial regenerative response to  
330 irradiation injury; (5) demonstrated that miR-375 regulates intestinal epithelial survival and  
331 growth in murine enteroids *ex vivo* and *Drosophila* midgut *in vivo*; (6) shown that the loss of  
332 miR-375 can partially compensate for the anti-survival effect of Yap1 inhibition in murine  
333 enteroids; and (7) revealed that diminished expression of miR-375 is associated with intestinal  
334 tumor development in both mouse and human.

335

336 To our knowledge, this is the first report of the profiling of miRNA expression in Lgr5-High  
337 ISCs. Additionally, although previous reports from us and others have described the importance  
338 of miRNAs in the enteroendocrine cell lineage trajectory (Knudsen et al., 2015; Singh et al.,  
339 2020), this study is the first to our knowledge to investigate the function of an ISC-enriched  
340 miRNA. Furthermore, this is also the first study to our knowledge that employs single cell  
341 RNA-seq to investigate intestinal cell type-specific changes in gene expression in the genetic

342 absence of a miRNA. We found that at baseline the loss of miR-375 promotes tuft cell numbers,  
343 and accordingly, enhances eosinophil abundance and reduces *Heligmosomoides polygyrus*  
344 burden after infection. The detailed underlying molecular mechanisms merit further  
345 investigation. Also, we showed that the loss of miR-375 promotes the intestinal epithelial  
346 regenerative response to irradiation. Follow-up functional *ex vivo* studies in enteroids and *in*  
347 *vivo* studies in *Drosophila* midgut revealed that miR-375 contributes to the control of intestinal  
348 epithelial cell survival and proliferation, in part by regulation of Yap1. Likely, though, miR-375  
349 has many molecular targets beyond Yap1, and their identification warrant further study in the  
350 future.

351

352 Luminal changes in microbes and nutrients can also greatly influence the way ISCs effect  
353 changes in intestinal epithelial proliferation (Biton et al., 2018; Mah et al., 2014; Peck et al.,  
354 2017b). Our earlier report demonstrated that miR-375 is enriched in Sox9-Low cells, which are  
355 partially enriched for ISCs, and that its expression is markedly downregulated with exposure to  
356 luminal microbes (Peck et al., 2017a). This dependence may mediate the intestinal proliferative  
357 changes that are seen during postnatal intestinal development (Al-Nafussi and Wright, 1982) or  
358 with exposure to certain antibiotics (Hormann et al., 2014) or certain infectious agents (Santos et  
359 al., 2016). In addition to microbial influences, miR-375 has been associated with responding to  
360 host metabolic changes. Besides helping to determine the enteroendocrine lineage (Knudsen et  
361 al., 2015), it has a well characterized role in regulating secretion of insulin from pancreatic  $\beta$ -  
362 cells in response to glucose (Eliasson, 2017). Provision of a chronic high fat diet has been  
363 observed to enhance ISC number and the proliferation of the intestinal epithelium (Mah et al.,  
364 2014). However, our current examination of the effect of genetic deletion of miR-375 on ISC



365 activity in response to high fat diet has not revealed any significant changes in intestinal  
366 epithelial growth properties *in vivo*.

367

368 Finally, agents that damage ISCs, such as irradiation and chemotherapies, and that cause acute  
369 intestinal injury, will lead to enhanced intestinal proliferation after exposure (Dekaney et al.,  
370 2009; Gurley et al., 2017). Stem-like IECs that have lineage determining multipotency, such as  
371 those IECs that are enriched in Lower Side Population (LSP) FACS cells, can be induced under  
372 these conditions to assume the function of actively cycling ISCs to repopulate and renew the  
373 damaged intestinal epithelium (Roche et al., 2015; Yan et al., 2017). It is worth noting that in  
374 this report we have found that not only is miR-375 enriched in ISCs relative to enterocytes, it is  
375 further enriched in LSP cells relative to Lgr5-High ISCs. It is possible that the elevated  
376 expression of miR-375 in these facultative stem cells may help preserve their reserve status by  
377 setting a higher threshold for Wnt activation. They may be responsible for the enhancement of  
378 intestinal epithelial regeneration that we observe in 375-KO mice in response to radiation injury.  
379 Moreover, they may also contribute to the potential Wnt signaling-driven reduction in miR-375  
380 expression that we observe associated with intestinal tumors. Altogether, our data concerning  
381 miR-375's effect on ISC activity does give some indications that miR-375 may be involved in  
382 multiple aspects of physiological and pathophysiological regulation of ISCs that merit further  
383 detailed investigation in the future.

384

## 385 **Experimental Procedures**

386

387 **Mouse models.** The following mice were utilized: female and male Sox9-EGFP (Formeister et  
388 al., 2009), female Lgr5-EGFP (Sato et al., 2009), female and male wild-type C57BL/6, male  
389 wild-type and miR-375 null B62J (albino C57BL6/2J), male APC<sup>min</sup>, and male APC<sup>q1405x</sup>.  
390 The harvested small intestine was measured and divided into three equal segments. The middle  
391 region was considered jejunum. All animal procedures were performed with the approval and  
392 authorization of the Institutional Animal Care and Use Committee at each participating  
393 institution. Mice were used in these experiments due to their tractability to genetic manipulation,  
394 including deletion of the microRNA of interest, as well as the availability of a wide array of  
395 appropriate experimental reagents. Mice were housed in well-ventilated cages under 12 hr  
396 light/dark cycles with free access to water and standard chow in addition to tubing for  
397 environmental enrichment. During experimentation, the mice were monitored at regular  
398 intervals to determine their well-being, and at the time of tissue collection the mice were  
399 anesthetized by CO<sub>2</sub> inhalation and euthanized by means of cervical dislocation.

400  
401 **Generation of miR-375 knockout mice using CRISPR/Cas9.** To delete the miR-375 gene in the  
402 mouse, we used the CRISPR/Cas9 system with a guide RNA (gRNA) targeting the 946-965 bp  
403 region of the mouse miR-375 gene (ENSMUSG00000065616). 173 FVBxB62J F1 hybrid 1-cell  
404 embryos were co-injected with 2.5 µg of gRNA and 7.5 µg of Cas9 mRNA. 107 2-cell embryos  
405 were transferred to pseudo-pregnant recipient female mice at ~20 embryos/recipient. 20 founder  
406 pups were born and validated for deletion of the miR-375 gene by targeted genomic sequencing.  
407 Mice null for miR-375 were backcrossed at least three generations with B62J albino wildtype  
408 mice. Synthesis of the gRNA and mouse embryo co-injections and viable embryo emplacement

409 were performed by the Cornell Stem Cell and Transgenic Core Facility at Cornell University  
410 (work supported in part by Empire State Stem Cell Fund, contract number C024174).

411

412 ***Mouse helminth infection.*** The lifecycle of *Heligmosomoides polygyrus* was maintained in  
413 C57BL/6 mice as previously described (Camberis et al., 2003; Johnston et al., 2015). WT and  
414 375-KO B62J mice were infected by oral gavage with 200 *Heligmosomoides polygyrus* L3  
415 larvae. On day 14 post infection, adult worm burdens were assessed by counting the number of  
416 worms located in the entire length of the small intestine following exposure of the lumen by  
417 dissection.

418

419 ***Immune cell isolation.*** For assessment of Type 2 immune cell responses in the intestine, the  
420 murine mesenteric lymph nodes (MLNs) were harvested. Single cell suspensions of murine  
421 MLNs were prepared by mashing MLNs through a 70  $\mu\text{m}$  cell strainer and counting total number  
422 of cells.

423

424 ***Whole-body mouse irradiation.*** 4-5 months old male WT and 375-KO B62J mice were  
425 subjected to 10 Gy of whole-body X-radiation in a cesium-137 irradiator with rotating turntable.

426

427 ***Mouse high fat diet study.*** 2 months old male WT and 375-KO B62J mice were fed a high fat  
428 diet (45% kcal provided by fat) (D12451, Research Diets Inc., New Brunswick, NJ) ad libitum  
429 for 14-15 weeks. Body weights were measured weekly.

430

431 ***Mouse small intestinal villi and polyp isolation.*** Small intestinal villi were collected from  
432 C57BL/6 mice by scraping the mucosal surface of cold PBS-flushed and longitudinally cut  
433 whole small intestinal tissue with a glass coverslip. Isolated villi were pelleted by centrifugation  
434 (110 x g for 5 minutes at 4°C) and flash frozen. Using a dissection microscope, small intestinal  
435 polyps were identified and individually collected from cold PBS-flushed and longitudinally cut  
436 small intestine from APC<sup>min</sup> and APC<sup>q1405x</sup> mice. Polyps were subsequently flash frozen.

437  
438 ***Flow cytometry.*** Four distinct mouse-based cell marker systems were used to sort ISCs (Sox9-  
439 EGFP; Lgr5-EGFP; and Cd24) and stem-like IECs (Side Population). Mouse intestinal epithelial  
440 cells from the jejunum were dissociated and prepared for fluorescence-activated cell sorting  
441 (FACS) as described previously (Mah et al., 2014). For Sox9-EGFP, Lgr5-EGFP, and Side  
442 Population cell sorts: CD31-APC (BioLegend, San Diego, CA, cat. 102416), CD45-APC  
443 (BioLegend, cat. 1032124), Annexin-V-APC (Life Technologies, Carlsbad, CA, cat. A35110),  
444 and Sytox-Blue (Life Technologies, cat. S34857) staining were used to exclude endothelial cells,  
445 immune cells, apoptotic cells, and nonviable cells, respectively. The gating parameters of FACS  
446 sorting were described previously (Mah et al., 2014). For Cd24-Low cell sorts, UEA-FITC  
447 (Vector Laboratories, Burlingame, CA, cat. FL-1061), CD45-FITC (BioLegend, San Diego, CA,  
448 cat. 553080), and propidium iodide (BioLegend, cat. 421301) staining was used to exclude  
449 goblet/Paneth, endothelial, and nonviable cells, respectively. In addition, for these sorts CD24-  
450 Pac Blue (BioLegend, cat. 101819) and EpCAM-PECy7 (BioLegend, cat. 118215) staining was  
451 used to positively select for CD24<sup>+</sup> epithelial cells. The Sox9, Lgr5, and Side Population sorts  
452 were performed using a Mo-Flo XDP cell sorter (Beckman-Coulter, Fullerton, CA) at the  
453 University of North Carolina Flow Cytometry Core Facility. Sorting of Cd24-Low cells was

454 conducted at North Carolina State University, College of Veterinary Medicine using a Mo-Flo  
455 XDP cell sorter (Beckman-Coulter, Fullerton, CA). The cells were sorted directly into cold  
456 DMEM or lysis buffer.

457

458 Side population sorting was used to separate the sub-fraction of slowly cycling from active  
459 cycling intestinal stem cells, as described previously (von Furstenberg et al., 2014). Mouse  
460 intestinal epithelial cells from the jejunum of female C57BL/6 mice were prepared and sorted  
461 into either upper side population (consisting of actively cycling stem cells) or lower side  
462 population (consisting of slowly cycling stem cells) by the previously described gating methods  
463 (von Furstenberg et al., 2014). The side population sorting was performed using a Mo-Flo XDP  
464 cell sorter (Beckman-Coulter, Fullerton, CA) at the University of North Carolina Flow  
465 Cytometry Core Facility. Cells were sorted directly into cold lysis buffer (Norgen Biotek,  
466 Thorold, ON, Canada).

467

468 Immune cell suspensions from helminth-infected mice were incubated with Aqua Live/Dead  
469 Fixable Dye (Life Technologies, Grand Island, NY) and fluorochrome-conjugated monoclonal  
470 antibodies (mAbs) against mouse CD3 (17A2), CD4 (GK1.5), CD5 (53-7.3), CD11b (M1/70),  
471 CD11c (N418), CD19 (eBio1D3), CD25 (PC61.5), CD45 (30-F11), CD45.1 (A20), CD45.2  
472 (104), CD127 (eBioSB/199), CD90.2 (53-2.1), IL-33R (RMST2-2), IL-25R (MUNC33), NK1.1  
473 (PK136), Gata3 (TWAJ) or Siglec-F (E50-2440, BD Biosciences, San Jose, CA). All antibodies  
474 from Thermo Fisher unless otherwise noted. Eosinophils, ILC2s and CD4 T helper 2 cells (Th2)  
475 were gated as live, CD45<sup>+</sup>SiglecF<sup>+</sup>CD11b<sup>+</sup>; live, CD45<sup>+</sup>lin<sup>-</sup>CD90<sup>+</sup>CD127<sup>+</sup>ST2<sup>+</sup>CD4<sup>-</sup> and live,  
476 CD45<sup>+</sup>lin<sup>+</sup>CD90<sup>+</sup>CD4<sup>+</sup>Gata3<sup>+</sup>, respectively

477

478 ***Histological analysis.*** Mouse mid-jejunal tissue was fixed in 4% (v/v) neutral-buffered  
479 paraformaldehyde, embedded in paraffin, and cut into 5  $\mu\text{m}$  sections for various staining  
480 experiments. Haemotoxylin and eosin (H&E) staining was performed for morphometric  
481 analyses (crypt depth). Immunofluorescent staining of PH3 was performed to visualize  
482 proliferating cells. Briefly, sections were incubated with primary antibody (rabbit anti-PH3,  
483 1:100 dilution in immunofluorescence buffer,) (Cell Signaling, Danvers, MA, 9701S) overnight  
484 at 4° C followed by goat anti-rabbit Alexa fluor 594 secondary antibody (1:400, Invitrogen,  
485 Carlsbad, CA, cat. A1102) incubation for 1 hr at room temperature. Hoechst 33342 (1:1000,  
486 Invitrogen, cat. C10637) was used to visualize nuclei. Images were captured using a BX53  
487 Olympus scope (Olympus, Center Valley, PA).

488

489 ***RNA extraction and real-time qPCR.*** Total RNA was isolated using the Total or Single-cell  
490 RNA Purification kit (Norgen Biotek, Thorold, ON, Canada). High Capacity RNA to cDNA kit  
491 (Life Technologies, Grand Island, NY) was used for reverse transcription of RNA. TaqMan  
492 microRNA Reverse Transcription kit (Life Technologies) was used for reverse transcription of  
493 miRNA. Both miRNA and gene expression qPCR were performed using TaqMan assays (Life  
494 Technologies) with either TaqMan Universal PCR Master Mix (miRNA qPCR) or TaqMan Gene  
495 Expression Master Mix (mRNA qPCR) per the manufacturer's protocol on a BioRad CFX96  
496 Touch Real Time PCR Detection System (Bio-Rad Laboratories, Richmond, CA). Reactions  
497 were performed in triplicate using either U6 (miRNA qPCR) or Rps9 (mouse mRNA qPCR) as  
498 the normalizer.

499

500 ***Small RNA library preparation and sequencing.*** The small RNA sequencing of cells from the  
501 various cell sorts and from enteroids was conducted at Genome Sequencing Facility of Greehey  
502 Children's Cancer Research Institute at University of Texas Health Science Center at San  
503 Antonio. Libraries were prepared using the TriLink CleanTag Small RNA Ligation kit (TriLink  
504 Biotechnologies, San Diego, CA). Seven to eight libraries were sequenced per lane with single-  
505 end 50x on the HiSeq2500 platform. Raw sequencing data is available through GEO accession  
506 GSE151088.

507

508 ***RNA library preparation and sequencing.*** RNA-sequencing libraries from the Sox9<sup>+</sup>-EGFP  
509 sorts of chow-fed, high fat diet-fed, conventionalized, and germfree C57BL/6J mice were  
510 prepared using the Clontech SMARTer Ultra Low Input library preparation kit combined with  
511 Nextera XT DNA sample preparation kit (Illumina) and sequenced with single-end 100 bp on a  
512 HiSeq2000 platform at the UNC High Throughput Sequencing Core Facility, as previously  
513 described (Peck et al., 2017a). Raw sequencing data is available through GEO accession  
514 GSE151088.

515

516 ***scRNA-seq library preparation and sequencing.*** Mouse jejunal crypts from 1 year old male WT  
517 and 375-KO B62J mice were isolated as previously described (Mah et al., 2014; Peck et al.,  
518 2017a). Isolated crypts were resuspended in an ice cold solution of PBS with 0.04% (w/v)  
519 bovine serum albumin, and pelleted at 1000 x g at 4°C for 5 minutes. The crypts were  
520 subsequently digested with 0.3U/mL dispase I in HBSS at 37°C for 12 minutes with gentle  
521 agitation. After stopping dispase I activity with an addition of fetal bovine serum to a final  
522 concentration of 10% (v/v), the single cell suspension was filtered, pelleted at 500 x g at 4°C for

523 5 minutes, washed with cold HBSS, filtered again, and then resuspended in an ice cold solution  
524 of PBS with 0.04% (w/v) bovine serum albumin. Prior to submission, single cell suspensions  
525 were triturated by pipetting and evaluated for total viable cell number by using trypan blue  
526 staining with a TC20 automated cell counter (Bio-Rad Laboratories, Richmond, CA). Single cell  
527 RNA sequencing of these samples was performed at the Cornell University Biotechnology  
528 Resource Center. Libraries were prepared using the 10X Genomics Chromium preparation kit  
529 (10X Genomics, Pleasanton, CA). Raw sequencing data is available through GEO accession  
530 GSE151088.

531

532 ***Bioinformatics analysis.*** Small RNA-sequencing reads were aligned to the mouse genome  
533 (mm9) and quantified using miRquant 2.0 as previously described (Kanke et al., 2016), with the  
534 exception that raw miRNA counts were normalized using either RPM or DESeq2 (Love et  
535 al., 2014) to determine significance. miRNA annotation was performed using miRbase (r18 for  
536 mouse). RNA-sequencing reads were mapped to mouse genome release mm10 using STAR  
537 (v2.5.3a) (Dobin et al., 2013) and transcript quantification was performed using Salmon  
538 (v0.6.0) (Patro et al., 2017). Differential gene expression analysis was accomplished using  
539 DESeq2 (Love et al., 2014). Single cell RNA-sequencing was performed using 10x genomics  
540 cellranger software (v3.0.1) and aligned to the mouse genome (mm10) to get a cell count matrix.  
541 Single cell RNA-seq data was subsequently filtered, clustered, visualized, and analyzed using  
542 Seurat (v3.1.5). Clusters were assigned cell types using markers reported by Haber and  
543 coworkers (Haber et al., 2017), and unassigned or immune-like clusters were discarded, resulting  
544 in 2614 WT and 3080 375-KO B62J mouse cells.

545



546 ***TCGA analysis.*** Data Download: RNA-seq data from 382 primary colon tumor samples and 39  
547 solid normal tissue were downloaded from the TCGA database. High Throughput Sequencing  
548 (HTSeq) counts data were downloaded using the NIHGDC Data Transfer Tool and normalized  
549 using DESeq2. miRNA data from 371 primary colon tumor samples and 8 solid normal tissue  
550 were downloaded from the TCGA database. miRNA quantification data using mirbase21 were  
551 downloaded using the NIHGDC Data Transfer Tool. Scatterplot graph to narrow down miR-  
552 375:miRNAs were filtered for those that had an average expression above 50 RPMMM in the  
553 solid normal tissue (n=8). Fold-change was calculated for each miRNA by adding 0.1 RPMMM  
554 to all values and calculating the average expression for all tumor samples (n=371) and dividing  
555 by the average for all solid normal tissue (n=8). A log<sub>2</sub> normalization was then applied to these  
556 fold-change values. The average expression for each miRNA and the corresponding log<sub>2</sub> fold-  
557 change were then graphed as a scatterplot. All tumor vs non-tumor miR-375 Graph: miR-375  
558 expression was extracted for each primary colon tumor (n= 371) and solid normal colon tissue  
559 (n=8). Expression of miR-375 was then graphed according to the tissue condition. Matched  
560 tumor vs non-tumor miR375 Graph: Datasets representing the patient matched tumor and solid  
561 normal tissue (n=8) were identified using the TCGA IDs. Expression for miR-375 was extracted  
562 and graphed. Lines connecting data points link patient matched samples. Correlation analysis  
563 graph: Significantly upregulated genes in primary colon tumor samples were identified as those  
564 genes with an average expression above 1000 normalized counts in tumor (n=39) or non-tumor  
565 (n=382), a Benjamini Hochberg adjusted P-value below 0.05, and a log<sub>2</sub> fold-change above 0.  
566 Spearman correlation coefficients were calculated for each upregulated gene with miR-375 for  
567 those samples with both RNA-seq and miRNA data (n=368). Each of the upregulated genes was

568 ranked based on its Spearman correlation coefficient with miR-375. The determined rank was  
569 then graphed against the calculated correlation value.

570

571 ***Mouse Enteroid culture.*** Jejunal crypts were isolated from 3-5 month old male WT and 375-KO  
572 B62J mice as previously described (Peck et al., 2017a). The isolated crypts (Day 0) were grown  
573 into Reduced Growth Factor Matrigel (Corning, Corning, NY, cat. 356231). Advanced  
574 DMEM/F12 (Gibco, Gaithersburg, MD, cat. 12634-028) supplemented with GlutaMAX (Gibco,  
575 cat. 35050-061), Pen/Strep (Gibco, cat. 15140), HEPES (Gibco, cat. 15630-080), N2 supplement  
576 (Gibco, cat. 17502-048), 50 ng/mL EGF (R&D Systems, Minneapolis, MN, cat.2028-EG), 100  
577 ug/mL Noggin (PeproTech, Rocky Hill, NJ, cat. 250-38), 250 ng/uL murine R-spondin (R&D  
578 Systems, cat. 3474-RS-050), and 10 mM Y27632 (Enzo Life Sciences, Farmingdale, NY, cat.  
579 ALX270-333-M025) was added. For miRNA loss-of-function studies, miRCURY LNA Power  
580 Inhibitor against mouse miR-375 (mmu-miR-375-3p) (Qiagen, Hilden, Germany, cat.  
581 Y104101397-DFA) or Power Negative Control A (Qiagen, cat. YI00199006-DDA) was added at  
582 500 nM on Day 0 and supplemented at 250 nM on Day 3. Enteroids at Day 5 were harvested for  
583 RNA isolation or fixed in 4% (v/v) paraformaldehyde for whole mount staining. For studies  
584 inhibiting Wnt and Yap1 function, enteroids were treated with IWP2 (Tocris Bioscience, Bristol,  
585 UK, cat. 3533) and verteporfin (Sigma-Aldrich, St. Louis, MO, cat. SML0534-5ML),  
586 respectively. Enteroid cultures were exposed to these inhibitors at Day 0 with the initial medium  
587 and at Day 3 with the replenishment medium.

588

589 ***Whole mount enteroids immunostaining and imaging.*** The fixed mouse enteroids were  
590 permeabilized with 0.5% (v/v) Triton X-100/PBS, washed with PBS containing 0.1% (w/v)

591 BSA/0.02% (v/v) TritonX-100/0.05% (v/v) Tween-20 and blocked with 10% (v/v) normal goat  
592 serum. Primary antibodies were used to stain PH3 (rabbit anti- Phospho-Histone H3 (Ser10),  
593 1:100, Cell Signaling, Danvers, MA, cat. 9701S). The staining was visualized by fluorescence  
594 microscopy with fluorescent-conjugated secondary antibodies (goat anti rabbit Alexa Fluor 594,  
595 1:400, ThermoFisher, Waltham, MA, cat. A-11034). Nuclei were counterstained with Hoechst  
596 33348 dye (1:1000). The immunofluorescent staining was visualized and z-stack bright field  
597 images were taken by a ZEISS Axiovert 200M inverted microscope (Zeiss, Jena, Germany).

598

599 ***CRISPR/Cas9 editing of mouse enteroids.*** The proximal half of the small intestine was  
600 harvested from ~6-week-old C57BL/6 mice. Crypts were isolated and plated in Matrigel. Cells  
601 were grown for 3-4 weeks to allow enteroids to form. Enteroids were then transfected with  
602 CRISPR base editing tools and guide RNAs to make the APC<sup>Q883\*</sup> edit (Han et al., 2017). Cells  
603 were then cultured in the absence of Rspo for ~2 weeks to select for Apc mutant cells.  
604 Following selection, cells were frozen down.

605

606 ***Generation and infection of genetically modified lines of Drosophila.*** Esg-Gal4; UAS-GFP,  
607 tub-Gal80<sup>TS</sup> (Esg<sup>TS</sup>, progenitor specific) (Micchelli and Perrimon, 2006) or Esg<sup>F/O</sup> (Esg-Gal4,  
608 UAS-GFP, tub-Gal80TS; UAS-FLP, act<sub>ftt</sub>STOP<sub>ftt</sub>-Gal4) (Jiang and Edgar, 2009) fruit flies were  
609 crossed to UAS lines (BDSC 59916) for creating flies with miR-375 overexpression in Esg  
610 stem/progenitor cells. Parental flies were crossed using ~15 female flies and 5 males. They  
611 were then transferred during development in a 12:12 hour light/dark 18°C incubator. The  
612 parental generation was removed after 5 days in the 18°C incubator to control for fly density of  
613 the F1 progeny. Esg<sup>TS</sup> or Esg<sup>F/O</sup> flies were crossed to wild type line CantonS (BDSC: 64349) to

614 generate control flies. Parental lines were maintained at room temperature (~23°C) on standard  
615 fly medium (50 g baker yeast, 30 g cornmeal, 20 g sucrose, 15 g agar, 5 mL 99% (v/v) propionic  
616 acid mix, 0.5 mL 85% (v/v) phosphoric acid, 26.5 mL methyl paraben in 1L ethanol) in a 12:12  
617 hours light/dark cycle. Oral infection of pathogen *Erwinia carotovora ssp. carotovora* 15  
618 (*Ecc15*) was performed as previously described (Buchon et al., 2009). Orally treated flies were  
619 incubated at 29°C until dissection for analyses.

620

621 ***Immunostaining of Drosophila midgut.*** The excised *Drosophila* midguts were fixed in 4%  
622 (v/v) paraformaldehyde and washed with 0.1% (v/v) Triton X-100 in PBS. The samples were  
623 then incubated for 1 hr in blocking solution (1% (w/v) bovine serum albumin, 1% (v/v) normal  
624 donkey serum, and 0.1% (v/v) Triton X-100 in PBS) followed by overnight primary antibody  
625 incubation and 2 hr secondary antibody staining. The primary antibody used in this study was  
626 rabbit anti-PH3 (1:000, EMD Millipore, Burlington, MA, cat. 06-570). The secondary antibody  
627 used in this study was donkey anti-rabbit-555 (1:2000, Thermo Fisher, Waltham, MA, cat. A-  
628 31572). DAPI (1:50000) was used to visualize nuclei. Imaging was performed on a Zeiss LSM  
629 700 fluorescent/ confocal inverted microscope (Zeiss, Jena, Germany).

630

631 ***Statistics.*** In most figure panels, quantitative data are reported as an average of biological  
632 replicates ± standard error of the mean. In figure panels pertaining to whole mount  
633 immunofluorescent staining in enteroids, quantitative data are reported as an average per  
634 enteroid from an experiment ± standard error of the mean (enteroids from n=2-5 wells per  
635 condition). In all analyses, statistical differences were assessed by two-tailed Student's t-test  
636 with threshold P-value < 0.05, unless otherwise specifically noted.

637

## 638 **Acknowledgments**

639 We gratefully acknowledge the following grants that funded the research work described in this  
640 study: American Diabetes Association 1-16-ACE-47 (awarded to P.S.), a Cornell Intercampus  
641 Collaborative Seed Grant (awarded to P.S. and L.E.D.), NIH/NIAID R01AI130379 (awarded to  
642 E.D.T), NIH/NIAID R21AI153934 (awarded to N.B.), American Cancer Society 131461-RSG-  
643 17-202-01-TBG (awarded to L.E.D.), NIH/NCI R01CA222517-01A1 (awarded to L.E.D.),  
644 NIH/NIDDK R01DK100508 (awarded to C.D.), NIH P50HD076210 (awarded to J.C.S), a  
645 Comparative Medicine and Translational Research Training Program Fellowship T32OD011130  
646 (awarded to B.S.), a SUNY Diversity Fellowship (awarded to J.W.V), and a NYSTEM  
647 fellowship (awarded to Y-H.H).

648

## 649 **Author Contributions**

650 Conceptualization, M.T.S., M.K., A.P.S., and P.S.; Methodology, M.T.S., M.K., A.P.S., and  
651 P.S.; Formal Analysis, M.K., J.W.V., and W.A.P.; Investigation, M.T.S., M.K., A.P.S., J.W.V.,  
652 A.J.M., O.O.O., A.B., Y-H.H., B.S., J.C.B., R.L.C., E.G.C, V.D.R., and B.C.E.P.; Resources,  
653 C.M.D., S.D., J.C.S., L.E.D., N.B., E.D.T., and P.S.; Writing-Original Draft, M.T.S., M.K., and  
654 P.S.; Writing-Review & Editing, M.T.S., M.K., A.P.S., J.W.V., O.O.O., A.B., Y-H.H., C.M.D.,  
655 L.E.D., N.B., E.D.T., and P.S.; Visualization, M.T.S., M.K., A.P.S., and Y-H.H.; Supervision,  
656 P.S.; Funding acquisition, J.W.V., Y-H.H., B.S., C.D., J.C.S., L.E.D., N.B., E.D.T., and P.S..

657

## 658 **Declaration of Interests**

659 The authors declare no competing interests.

660

661 **References**

662

663 Al-Nafussi, A.I., and Wright, N.A. (1982). Cell kinetics in the mouse small intestine during  
664 immediate postnatal life. *Virchows Arch B Cell Pathol Incl Mol Pathol* *40*, 51-62.

665

666 Ayyaz, A., Kumar, S., Sangiorgi, B., Ghoshal, B., Gosio, J., Ouladan, S., Fink, M., Barutcu, S., Trcka,  
667 D., Shen, J., *et al.* (2019). Single-cell transcriptomes of the regenerating intestine reveal a revival  
668 stem cell. *Nature* *569*, 121-125.

669

670 Barker, N. (2014). Adult intestinal stem cells: critical drivers of epithelial homeostasis and  
671 regeneration. *Nat Rev Mol Cell Biol* *15*, 19-33.

672

673 Barker, N., van Es, J.H., Kuipers, J., Kujala, P., van den Born, M., Cozijnsen, M., Haegebarth, A.,  
674 Korving, J., Begthel, H., Peters, P.J., *et al.* (2007). Identification of stem cells in small intestine  
675 and colon by marker gene *Lgr5*. *Nature* *449*, 1003-1007.

676

677 Bartel, D.P. (2018). Metazoan MicroRNAs. *Cell* *173*, 20-51.

678

679 Beyaz, S., Mana, M.D., Roper, J., Kedrin, D., Saadatpour, A., Hong, S.J., Bauer-Rowe, K.E.,  
680 Xifaras, M.E., Akkad, A., Arias, E., *et al.* (2016). High-fat diet enhances stemness and  
681 tumorigenicity of intestinal progenitors. *Nature* *531*, 53-58.

682

683 Biton, M., Haber, A.L., Rogel, N., Burgin, G., Beyaz, S., Schnell, A., Ashenberg, O., Su, C.W.,

684 Smillie, C., Shekhar, K., *et al.* (2018). T Helper Cell Cytokines Modulate Intestinal Stem Cell

685 Renewal and Differentiation. *Cell* *175*, 1307-1320 e1322.

686

687 Bu, P., Wang, L., Chen, K.Y., Srinivasan, T., Murthy, P.K., Tung, K.L., Varanko, A.K., Chen, H.J., Ai,

688 Y., King, S., *et al.* (2016). A miR-34a-Numb Feedforward Loop Triggered by Inflammation

689 Regulates Asymmetric Stem Cell Division in Intestine and Colon Cancer. *Cell Stem Cell* *18*, 189-

690 202.

691

692 Buchon, N., Broderick, N.A., Kuraishi, T., and Lemaitre, B. (2010). *Drosophila* EGFR pathway

693 coordinates stem cell proliferation and gut remodeling following infection. *BMC Biol* *8*, 152.

694

695 Buchon, N., Broderick, N.A., Poidevin, M., Pradervand, S., and Lemaitre, B. (2009). *Drosophila*

696 intestinal response to bacterial infection: activation of host defense and stem cell proliferation.

697 *Cell Host Microbe* *5*, 200-211.

698

699 Camberis, M., Le Gros, G., and Urban, J., Jr. (2003). Animal model of *Nippostrongylus*

700 *brasiliensis* and *Heligmosomoides polygyrus*. *Curr Protoc Immunol Chapter 19*, Unit 19 12.

701

702 Chen, C.H., Luhur, A., and Sokol, N. (2015). Lin-28 promotes symmetric stem cell division and

703 drives adaptive growth in the adult *Drosophila* intestine. *Development* *142*, 3478-3487.

704

705 Dekaney, C.M., Gulati, A.S., Garrison, A.P., Helmrath, M.A., and Henning, S.J. (2009).

706 Regeneration of intestinal stem/progenitor cells following doxorubicin treatment of mice. *Am J*

707 *Physiol Gastrointest Liver Physiol* 297, G461-470.

708

709 Dekaney, C.M., Rodriguez, J.M., Graul, M.C., and Henning, S.J. (2005). Isolation and

710 characterization of a putative intestinal stem cell fraction from mouse jejunum.

711 *Gastroenterology* 129, 1567-1580.

712

713 Dobin, A., Davis, C.A., Schlesinger, F., Drenkow, J., Zaleski, C., Jha, S., Batut, P., Chaisson, M.,

714 and Gingeras, T.R. (2013). STAR: ultrafast universal RNA-seq aligner. *Bioinformatics* 29, 15-21.

715

716 Dow, L.E., O'Rourke, K.P., Simon, J., Tschaharganeh, D.F., van Es, J.H., Clevers, H., and Lowe,

717 S.W. (2015). Apc Restoration Promotes Cellular Differentiation and Reestablishes Crypt

718 Homeostasis in Colorectal Cancer. *Cell* 161, 1539-1552.

719

720 Eliasson, L. (2017). The small RNA miR-375 - a pancreatic islet abundant miRNA with multiple

721 roles in endocrine beta cell function. *Mol Cell Endocrinol* 456, 95-101.

722

723 Flanagan, D.J., Austin, C.R., Vincan, E., and Phesse, T.J. (2018). Wnt Signalling in Gastrointestinal

724 Epithelial Stem Cells. *Genes (Basel)* 9.

725



726 Formeister, E.J., Sionas, A.L., Lorance, D.K., Barkley, C.L., Lee, G.H., and Magness, S.T. (2009).  
727 Distinct SOX9 levels differentially mark stem/progenitor populations and enteroendocrine cells  
728 of the small intestine epithelium. *Am J Physiol Gastrointest Liver Physiol* 296, G1108-1118.  
729

730 Foronda, D., Weng, R., Verma, P., Chen, Y.W., and Cohen, S.M. (2014). Coordination of insulin  
731 and Notch pathway activities by microRNA miR-305 mediates adaptive homeostasis in the  
732 intestinal stem cells of the *Drosophila* gut. *Genes Dev* 28, 2421-2431.  
733

734 Gebert, L.F.R., and MacRae, I.J. (2019). Regulation of microRNA function in animals. *Nat Rev*  
735 *Mol Cell Biol* 20, 21-37.  
736

737 Gerbe, F., Sidot, E., Smyth, D.J., Ohmoto, M., Matsumoto, I., Dardalhon, V., Cesses, P., Garnier,  
738 L., Pouzolles, M., Brulin, B., *et al.* (2016). Intestinal epithelial tuft cells initiate type 2 mucosal  
739 immunity to helminth parasites. *Nature* 529, 226-230.  
740

741 Gurley, K.E., Ashley, A.K., Moser, R.D., and Kemp, C.J. (2017). Synergy between *Prkdc* and *Trp53*  
742 regulates stem cell proliferation and GI-ARS after irradiation. *Cell Death Differ* 24, 1853-1860.  
743

744 Haber, A.L., Biton, M., Rogel, N., Herbst, R.H., Shekhar, K., Smillie, C., Burgin, G., Delorey, T.M.,  
745 Howitt, M.R., Katz, Y., *et al.* (2017). A single-cell survey of the small intestinal epithelium.  
746 *Nature* 551, 333-339.  
747

748 Han, T., Schatoff, E.M., Murphy, C., Zafra, M.P., Wilkinson, J.E., Elemento, O., and Dow, L.E.  
749 (2017). R-Spondin chromosome rearrangements drive Wnt-dependent tumour initiation and  
750 maintenance in the intestine. *Nat Commun* **8**, 15945.  
751

752 He, X.C., Zhang, J., Tong, W.G., Tawfik, O., Ross, J., Scoville, D.H., Tian, Q., Zeng, X., He, X.,  
753 Wiedemann, L.M., *et al.* (2004). BMP signaling inhibits intestinal stem cell self-renewal through  
754 suppression of Wnt-beta-catenin signaling. *Nat Genet* **36**, 1117-1121.  
755

756 Henning, S.J., and von Furstenberg, R.J. (2016). GI stem cells - new insights into roles in  
757 physiology and pathophysiology. *J Physiol* **594**, 4769-4779.  
758

759 Hormann, N., Brandao, I., Jackel, S., Ens, N., Lillich, M., Walter, U., and Reinhardt, C. (2014). Gut  
760 microbial colonization orchestrates TLR2 expression, signaling and epithelial proliferation in the  
761 small intestinal mucosa. *PLoS One* **9**, e113080.  
762

763 Huntoon, C.J., Nye, M.D., Geng, L., Peterson, K.L., Flatten, K.S., Haluska, P., Kaufmann, S.H., and  
764 Karnitz, L.M. (2010). Heat shock protein 90 inhibition depletes LATS1 and LATS2, two regulators  
765 of the mammalian hippo tumor suppressor pathway. *Cancer Res* **70**, 8642-8650.  
766

767 Ivey, K.N., and Srivastava, D. (2010). MicroRNAs as regulators of differentiation and cell fate  
768 decisions. *Cell Stem Cell* **7**, 36-41.  
769

770 Jiang, H., and Edgar, B.A. (2009). EGFR signaling regulates the proliferation of *Drosophila* adult  
771 midgut progenitors. *Development* *136*, 483-493.

772

773 Jiang, L., and Hermeking, H. (2017). miR-34a and miR-34b/c Suppress Intestinal Tumorigenesis.  
774 *Cancer Res* *77*, 2746-2758.

775

776 Johnston, C.J., Robertson, E., Harcus, Y., Grainger, J.R., Coakley, G., Smyth, D.J., McSorley, H.J.,  
777 and Maizels, R. (2015). Cultivation of *Heligmosomoides polygyrus*: an immunomodulatory  
778 nematode parasite and its secreted products. *J Vis Exp*, e52412.

779

780 Kanke, M., Baran-Gale, J., Villanueva, J., and Sethupathy, P. (2016). miRquant 2.0: an Expanded  
781 Tool for Accurate Annotation and Quantification of MicroRNAs and their isomiRs from Small  
782 RNA-Sequencing Data. *J Integr Bioinform* *13*, 307.

783

784 Kim, K., Hung, R.J., and Perrimon, N. (2017). miR-263a Regulates ENaC to Maintain Osmotic and  
785 Intestinal Stem Cell Homeostasis in *Drosophila*. *Dev Cell* *40*, 23-36.

786

787 Knudsen, L.A., Petersen, N., Schwartz, T.W., and Egerod, K.L. (2015). The MicroRNA Repertoire  
788 in Enteroendocrine Cells: Identification of miR-375 as a Potential Regulator of the  
789 Enteroendocrine Lineage. *Endocrinology* *156*, 3971-3983.

790

791 Liu-Chittenden, Y., Huang, B., Shim, J.S., Chen, Q., Lee, S.J., Anders, R.A., Liu, J.O., and Pan, D.  
792 (2012). Genetic and pharmacological disruption of the TEAD-YAP complex suppresses the  
793 oncogenic activity of YAP. *Genes Dev* *26*, 1300-1305.

794

795 Liu, A.M., Poon, R.T., and Luk, J.M. (2010). MicroRNA-375 targets Hippo-signaling effector YAP  
796 in liver cancer and inhibits tumor properties. *Biochem Biophys Res Commun* *394*, 623-627.

797

798 Love, M.I., Huber, W., and Anders, S. (2014). Moderated estimation of fold change and  
799 dispersion for RNA-seq data with DESeq2. *Genome Biol* *15*, 550.

800

801 Mah, A.T., Van Landeghem, L., Gavin, H.E., Magness, S.T., and Lund, P.K. (2014). Impact of diet-  
802 induced obesity on intestinal stem cells: hyperproliferation but impaired intrinsic function that  
803 requires insulin/IGF1. *Endocrinology* *155*, 3302-3314.

804

805 McKenna, L.B., Schug, J., Vourekas, A., McKenna, J.B., Bramswig, N.C., Friedman, J.R., and  
806 Kaestner, K.H. (2010). MicroRNAs control intestinal epithelial differentiation, architecture, and  
807 barrier function. *Gastroenterology* *139*, 1654-1664, 1664 e1651.

808

809 Micchelli, C.A., and Perrimon, N. (2006). Evidence that stem cells reside in the adult *Drosophila*  
810 midgut epithelium. *Nature* *439*, 475-479.

811

812 Mo, M.L., Li, M.R., Chen, Z., Liu, X.W., Sheng, Q., and Zhou, H.M. (2013). Inhibition of the Wnt  
813 palmitoyltransferase porcupine suppresses cell growth and downregulates the Wnt/beta-  
814 catenin pathway in gastric cancer. *Oncol Lett* 5, 1719-1723.  
815

816 Nalapareddy, K., Nattamai, K.J., Kumar, R.S., Karns, R., Wikenheiser-Brokamp, K.A., Sampson,  
817 L.L., Mahe, M.M., Sundaram, N., Yacyshyn, M.B., Yacyshyn, B., *et al.* (2017). Canonical Wnt  
818 Signaling Ameliorates Aging of Intestinal Stem Cells. *Cell Rep* 18, 2608-2621.  
819

820 Patro, R., Duggal, G., Love, M.I., Irizarry, R.A., and Kingsford, C. (2017). Salmon provides fast and  
821 bias-aware quantification of transcript expression. *Nat Methods* 14, 417-419.  
822

823 Peck, B.C., Mah, A.T., Pitman, W.A., Ding, S., Lund, P.K., and Sethupathy, P. (2017a). Functional  
824 Transcriptomics in Diverse Intestinal Epithelial Cell Types Reveals Robust MicroRNA Sensitivity  
825 in Intestinal Stem Cells to Microbial Status. *J Biol Chem* 292, 2586-2600.  
826

827 Peck, B.C.E., Shanahan, M.T., Singh, A.P., and Sethupathy, P. (2017b). Gut Microbial Influences  
828 on the Mammalian Intestinal Stem Cell Niche. *Stem Cells Int* 2017, 5604727.  
829

830 Peng, S., Gao, D., Gao, C., Wei, P., Niu, M., and Shuai, C. (2016). MicroRNAs regulate signaling  
831 pathways in osteogenic differentiation of mesenchymal stem cells (Review). *Mol Med Rep* 14,  
832 623-629.  
833

- 834 Richmond, C.A., Shah, M.S., Carlone, D.L., and Breault, D.T. (2016). An enduring role for  
835 quiescent stem cells. *Dev Dyn* 245, 718-726.
- 836
- 837 Roche, K.C., Gracz, A.D., Liu, X.F., Newton, V., Akiyama, H., and Magness, S.T. (2015). SOX9  
838 maintains reserve stem cells and preserves radioresistance in mouse small intestine.  
839 *Gastroenterology* 149, 1553-1563 e1510.
- 840
- 841 Santos, A.J.M., Durkin, C.H., Helaine, S., Boucrot, E., and Holden, D.W. (2016). Clustered  
842 Intracellular *Salmonella enterica* Serovar Typhimurium Blocks Host Cell Cytokinesis. *Infect*  
843 *Immun* 84, 2149-2158.
- 844
- 845 Sato, T., Vries, R.G., Snippert, H.J., van de Wetering, M., Barker, N., Stange, D.E., van Es, J.H.,  
846 Abo, A., Kujala, P., Peters, P.J., *et al.* (2009). Single Lgr5 stem cells build crypt-villus structures in  
847 vitro without a mesenchymal niche. *Nature* 459, 262-265.
- 848
- 849 Schneikert, J., and Behrens, J. (2006). Truncated APC is required for cell proliferation and DNA  
850 replication. *Int J Cancer* 119, 74-79.
- 851
- 852 Singh, A.P., Hung, Y.H., Shanahan, M.T., Kanke, M., Bonfini, A., Dame, M.K., Biraud, M., Peck,  
853 B.C.E., Oyesola, O.O., Freund, J.M., *et al.* (2020). Enteroendocrine Progenitor Cell-Enriched miR-  
854 7 Regulates Intestinal Epithelial Proliferation in an Xiap-Dependent Manner. *Cell Mol*  
855 *Gastroenterol Hepatol* 9, 447-464.

856

857 Tao, S., Tang, D., Morita, Y., Sperka, T., Omrani, O., Lechel, A., Sakk, V., Kraus, J., Kestler, H.A.,  
858 Kuhl, M., *et al.* (2015). Wnt activity and basal niche position sensitize intestinal stem and  
859 progenitor cells to DNA damage. *EMBO J* 34, 624-640.

860

861 Tian, Y., Ma, X., Lv, C., Sheng, X., Li, X., Zhao, R., Song, Y., Andl, T., Plikus, M.V., Sun, J., *et al.*  
862 (2017). Stress responsive miR-31 is a major modulator of mouse intestinal stem cells during  
863 regeneration and tumorigenesis. *Elife* 6.

864

865 von Furstenberg, R.J., Buczacki, S.J., Smith, B.J., Seiler, K.M., Winton, D.J., and Henning, S.J.  
866 (2014). Side population sorting separates subfractions of cycling and non-cycling intestinal stem  
867 cells. *Stem Cell Res* 12, 364-375.

868

869 von Furstenberg, R.J., Gulati, A.S., Baxi, A., Doherty, J.M., Stappenbeck, T.S., Gracz, A.D.,  
870 Magness, S.T., and Henning, S.J. (2011). Sorting mouse jejunal epithelial cells with CD24 yields a  
871 population with characteristics of intestinal stem cells. *Am J Physiol Gastrointest Liver Physiol*  
872 300, G409-417.

873

874 Yan, K.S., Gevaert, O., Zheng, G.X.Y., Anchang, B., Probert, C.S., Larkin, K.A., Davies, P.S., Cheng,  
875 Z.F., Kaddis, J.S., Han, A., *et al.* (2017). Intestinal Enteroendocrine Lineage Cells Possess  
876 Homeostatic and Injury-Inducible Stem Cell Activity. *Cell Stem Cell* 21, 78-90 e76.

877

878 Yu, F.X., Meng, Z., Plouffe, S.W., and Guan, K.L. (2015). Hippo pathway regulation of  
879 gastrointestinal tissues. *Annu Rev Physiol* 77, 201-227.  
880  
881 Zhang, H., Wang, Y., Yang, G., Yu, H., Zhou, Z., and Tang, M. (2019). MicroRNA-30a regulates  
882 chondrogenic differentiation of human bone marrow-derived mesenchymal stem cells through  
883 targeting Sox9. *Exp Ther Med* 18, 4689-4697.  
884  
885 Zhao, B., Tumaneng, K., and Guan, K.L. (2011). The Hippo pathway in organ size control, tissue  
886 regeneration and stem cell self-renewal. *Nat Cell Biol* 13, 877-883.

887

## 888 **Figure legends**

889

890 **Figure 1. miR-375 is highly enriched in Lgr5-High ISC's and stem-like LSP cells.** **A,**  
891 Volcano plot of differentially expressed microRNAs assessed by small RNA-seq analysis of  
892 isolated jejunal crypts relative to isolated jejunal villi from 3-5 months old C57BL/6 male mice  
893 (n=4). Only microRNAs with an RPMMM > 1000 in either crypt or villi were included in the  
894 analysis. Significant ( $P < 0.05$ ; Student's t-test) microRNAs with fold changes above 2.5 in  
895 intestinal crypts are colored red, while significant microRNAs with fold changes below -2.5 in  
896 intestinal crypts are colored blue. miR-375 is colored green. **B,** Venn diagram of the top 20  
897 expressed microRNAs in Sox9-Low (blue), Lgr5-High (green), and Cd24-Low (red) FACS  
898 sorted cells. **C,** RT-qPCR data of miR-375 expression in jejunal crypts (n=2) of C57BL/6 mice  
899 relative to jejunal villi (n=2). **D,** Enrichment of the 14 microRNAs common to stem cell  
900 fractions in Lgr5-High cells versus Sox9-Neg cells. miR-375-3p is identified in black. **E,**



901 Enrichment of the 14 microRNAs common to stem cell fractions in Sox9-Low cells versus Sox9-  
902 Neg cells. miR-375-3p is identified in black. **F**, RT-qPCR data of miR-375 expression of LSP  
903 sorted cells (n=3) relative to USP sorted cells (n=3). **G**, RT-qPCR data of miR-375 expression  
904 in jejunal crypts of 11-17 months old C57BL/6 male mice (Old, n=6) relative to 2-5 months old  
905 mice (Young, n=6). **H**, RT-qPCR data of miR-375 expression in jejunal enteroids established  
906 from tissue of WT B62J mice treated with 1  $\mu$ M of Wnt antagonist IWP2 (n=3) relative to the  
907 mock condition (n=3). Representative of three independent experiments. **I**, Volcano plot of  
908 differentially expressed microRNAs assessed by small RNA-seq analysis of mouse jejunal  
909 enteroids with a Wnt activating APC mutation (APCmut) relative to non-mutated C57BL/6  
910 wildtype (WT). Only microRNAs with a normalized count > 1000 in either WT or APCmut  
911 were included in the analysis. Significant (adjusted  $P < 0.01$ ; DESeq2) microRNAs with fold  
912 change above 3 in APCmut enteroids are colored red, while significant microRNAs with fold  
913 change below -3 in APCmut enteroids are colored blue. miR-375 is identified in blue. **J**, RT-  
914 qPCR data of miR-375 expression in mouse jejunal enteroids with a Wnt activating APC  
915 mutation (APCmut, n=2) or a Wnt activating  $\beta$ -catenin mutation ( $\beta$ -Cat-mut, n=2) relative to  
916 non-mutated C57BL6/J (WT, n=2). \*  $P < 0.05$ , \*\*  $P < 0.01$ , \*\*\*  $P < 0.001$  by two-tailed  
917 Student's t-test. RQV, relative quantitative value. RPM, reads per million miRNAs mapped.

918

919 **Figure 2. miR-375 deficiency increases small intestinal tuft cell numbers and enhances**  
920 **resistance to helminth *Heligmosomoides polygyrus* infection.** **A**, UMAP scatterplot of 12  
921 months old jejunal crypt cells from WT (n=2) and 375-KO (n=2) B62J mice analyzed by single  
922 cell RNA-seq. Cell clusters pertaining to the seven primary intestinal cell types are colored and  
923 labeled. **B**, Hierarchical clustering based on gene expression of classic markers of the seven

924 small intestinal cell types. Red indicates enriched expression relative to all cells whereas as blue  
925 indicates de-enrichment of expression. **C**, Bar plot of the ratio of the percentage of 375-KO-  
926 derived cells within the various intestinal cell type clusters to the percentage of those derived  
927 from WT mice. **D**, Bar plot of transcript levels of tuft cell marker genes (*Pou2f3*, *Gfi1b*, *Ascl2*,  
928 *Dclk1*, *Trpm5*, and *Rgs13*) across all 375-KO jejunal crypt cells relative to WT. **E**, Bar plot of  
929 the percentage of eosinophils within isolated immune cell suspensions from FACS analyzed  
930 small intestinal tissue from WT (n=10) and 375-KO (n=10) mice after 14 days of infection with  
931 the helminth *Heligmosomoides polygyrus*. **F**, Bar plot of the number of *Heligmosomoides*  
932 *polygyrus* worms collected from the small intestinal lumen of WT (n=7) and 375-KO (n=7) mice  
933 after 14 days of infection (two representative experiments out of a total of three are shown; red –  
934 experiment #1, blue – experiment #2). \* P < 0.05, \*\* P < 0.01, \*\*\* P < 0.001 by two-tailed  
935 Student's t-test.

936

937 **Figure 3. miR-375 deficiency augments the Wnt signaling pathway in ISCs and enhances**  
938 **the irradiation-induced regeneration response.** **A**, Ranked bar plot of the -log<sub>10</sub> P-values of  
939 the ten most enriched transcription factor regulators of the genes upregulated in the ISC cluster  
940 of 375-KO mice relative to WT mice. Established Wnt pathway transcription factors are denoted  
941 in orange. TRRUST is a manually-curated database of mouse and human transcriptional  
942 regulatory networks. **B**, Bar plots of the expression levels of Wnt signaling genes *Ccnd2*, *Cd44*,  
943 *Ascl2*, *Myc*, *Cldn2*, and *Trim65* within each of the cell clusters identified by scRNA-seq analysis  
944 in WT and 375-KO. **C**, UMAP scatter plots of a subset of genes shown in (B). Level of  
945 expression for the Wnt signaling genes *Ascl2*, *Myc*, and *Trim65* is shown in purple, while non-  
946 expressing cells are shown in grey. Only the ISC cluster is shown and the percentage of cells in

947 the ISC cluster that are positive for the assayed gene is indicated in the top right corner in red.  
948 **D**, Bar plot of the mid-jejunal crypt depth for WT (n=4-5 mice) and 375-KO mice (n=4-7 mice)  
949 1 day and 2.5 days after irradiation. **E**, Photomicrographs (x200) of H&E stained mid-jejunum  
950 in WT and 375-KO mice 1 day and 2.5 days post-irradiation (p.i.). Two different individual 375-  
951 KO mice are shown for 1 day and 2.5 days post-irradiation (p.i.). Yellow scalebar represents 50  
952  $\mu\text{m}$ . \*  $P < 0.05$ , \*\*  $P < 0.01$ , \*\*\*  $P < 0.001$  by one-tailed Student's t-test.

953

954 **Figure 4. *In vivo* genetic loss and *ex vivo* knockdown of miR-375 promotes intestinal**  
955 **epithelial survival and proliferation.** **A**, Plot of number of buds per enteroid of jejunal crypts  
956 derived from 375-KO relative to WT. **B**, Phase-contrast microphotographs (x400) of jejunal  
957 enteroids established from crypts of WT and 375-KO mice. Enteroid buds are indicated by red  
958 arrowheads. Yellow scalebar represents 50  $\mu\text{m}$ . **C**, Plot of relative number of surviving jejunal  
959 enteroids from WT and 375-KO mice under conditions of mock treatment (n=3) or treatment  
960 with 1  $\mu\text{M}$  of IWP2 (n=3). Values are expressed relative to mock treated WT mouse jejunal  
961 enteroids. Representative of three independent experiments (n=3-5 wells/group). **D**, Phase-  
962 contrast microphotographs (x50) of jejunal enteroids established from crypts of WT and 375-KO  
963 mice that were either mock treated or treated with 1  $\mu\text{M}$  of IWP2. Yellow scalebar represents  
964 500  $\mu\text{m}$ . **E**, Plot of number of buds per enteroid of wildtype (WT) B62J mouse jejunal enteroids  
965 that were either under mock, locked nucleic acid (LNA)-scrambled (LNA-scr) or anti-miR-375  
966 LNA (LNA-375) treated conditions (n=36 Mock, n=36 LNA-scr, n=31 LNA-375 enteroids  
967 examined). **F**, Phase-contrast microphotographs (x400) of WT mouse jejunal enteroids that were  
968 either mock, LNA-scr, or LNA-375 treated. Buds are indicated by red arrowheads. Yellow  
969 scalebar represents 50  $\mu\text{m}$ . **G**, Plot of number of PH3+ cells per enteroid of mock, LNA-scr, and

970 LNA-375 treated WT mouse jejunal enteroids (n=126 Mock, n=72 LNA-scr, n=58 LNA-375  
971 enteroids examined). Yellow scalebar represents 50  $\mu$ m. **H**, Fluorescent microphotographs  
972 (x400) of representative enteroids from WT mock, LNA-scr, and LNA-375 treated enteroid  
973 cultures. Hoechst-stained nuclei are shown in blue. PH3+ cells are shown in red and indicated  
974 by yellow arrowheads. Yellow scalebar represents 50  $\mu$ m. \*\*P < 0.01, \*\*\* P < 0.001 by two-  
975 tailed Student's t-test.

976

977 **Figure 5. *In vivo* overexpression of miR-375 in *Drosophila* midgut ISCs reduces**  
978 **proliferation.** **A**, Sequence alignment of mature miR-375 for *Homo sapiens* (hsa-miR-375-3p),  
979 *Mus musculus* (mmu-miR-375-3p), *Sus scrofa* (ssc-miR-375), and *Drosophila melanogaster*  
980 (dme-miR-375-3p). The conserved seed sequences are depicted in red. **B**, Confocal  
981 microphotographs (x200) of representative midgut sections of *esg<sup>F/O</sup>>CantonS* and  
982 *esg<sup>F/O</sup>>375OE Drosophila* in baseline, unchallenged (UC) conditions. Nuclei are shown in blue  
983 (DAPI). *Esg*+ progenitor cells (GFP+) and their differentiated progeny (GFP+) are shown in  
984 green. **C**, Confocal microphotographs (x200) of representative midgut sections of  
985 *esg<sup>TS</sup>>CantonS* and *esg<sup>TS</sup>>375OE Drosophila* in baseline, UC conditions. Nuclei are shown in  
986 blue (DAPI). *Esg*+ progenitor cells (GFP+) are shown in green. **D**, Confocal microphotographs  
987 (x200) of representative midgut sections of *esg<sup>TS</sup>>CantonS* and *esg<sup>TS</sup>>375OE Drosophila*  
988 infected with *Erwinia carotovora carotovora* 15 (*Ecc15*) for 12 h. Nuclei are shown in blue  
989 (DAPI). *Esg*+ progenitor cells (GFP+) are shown in green. Yellow scalebar indicates 50  $\mu$ m. **E**,  
990 Bar plots of total PH3+ cells in the entire midgut of control *D. melanogaster* (*esg<sup>TS</sup>>CantonS*,  
991 n=22-23) and *D. melanogaster* overexpressing miR-375 only in *esg*+ progenitor cells

992 (*esg*<sup>TS</sup>>375OE, n=23-26) under UC conditions or orally infected with *Ecc15* for 12 h. \*\*\* P <  
993 0.001 by two-tailed Student's t-test.

994

995 **Figure 6. miR-375 influences enteroid growth in part by regulating Yap1 signaling. A,**

996 Scatter plot of small RNA-seq-determined expression of miR-375 and RNA-seq-determined

997 expression of *Yap1* in jejunal Sox9-Low cells derived from matched mice that were in a diet

998 study in which they were fed either chow (Chow, red) (n=4) or a high fat diet (HFD, green)

999 (n=4) for a prolonged period (16-20 weeks), or were from a study in which the mice were either

1000 conventionalized (CV, blue) (n=4) or germfree (GF, purple) (n=4) (Peck, Mah et al.). Pearson

1001 correlation analysis revealed a strong inverse correlation (R= -0.808). **B,** Plot of number of buds

1002 per enteroid for WT and 375-KO mouse jejunal enteroids that were either mock treated or treated

1003 with 2  $\mu$ M or 5  $\mu$ M of verteporfin. **C,** Phase-contrast microphotographs (x400) of WT and 375-

1004 KO mouse jejunal enteroids treated with either 2  $\mu$ M or 5  $\mu$ M of verteporfin. Yellow scalebar

1005 indicates 25  $\mu$ m. **D,** Plot of number of surviving enteroids of WT (n=3) and 375-KO (n=3)

1006 mouse jejunal enteroids treated with either 2  $\mu$ M or 5  $\mu$ M of verteporfin. **E,** Phase-contrast

1007 microphotographs (x50) of WT and 375-KO mouse jejunal enteroids treated with either 2  $\mu$ M or

1008 5  $\mu$ M of verteporfin. Yellow scalebar indicates 500  $\mu$ m. \*P < 0.05, \*\*P < 0.01, \*\*\* P < 0.001 by

1009 two-tailed Student's t-test. RPMMM, reads per million mapped to microRNAs. RQV, relative

1010 quantitative value.

1011

1012 **Figure 7. Intestinal cancer is associated with depressed expression of miR-375.**

1013 **A,** Scatter plot using data from TCGA database to display the fold change of miRNA expression

1014 in human primary colon adenocarcinoma (n=371) to human colonic non-tumor tissue (n=8).

1015 miR-375 is indicated in red. **B**, Bar plot of miR-375 expression in colon non-tumor tissue (n=8)  
1016 and primary colon adenocarcinoma (n=371) from TCGA data. **C**, Dot plot of miR-375  
1017 expression from TCGA colon non-tumor tissue (n=8) and matched primary, colon  
1018 adenocarcinoma (n=8) with lines connecting tumors derived from the same patient. **D**,  
1019 Upregulated genes in TCGA primary colon adenocarcinoma that are predicted miR-375 targets  
1020 in mouse and human were ranked according to the calculated spearman correlation coefficient to  
1021 identify inversely correlated genes with miR-375 expression. *YAPI* is indicated in red. **E**,  
1022 Working model of miR-375 expression and function in the intestinal epithelium. \*P < 0.05, \*\*\*  
1023 P < 0.001 by two-tailed Student's t-test. RQV, relative quantitative value. RPMMM, reads per  
1024 million mapped to microRNAs.  
1025

# Figure 1

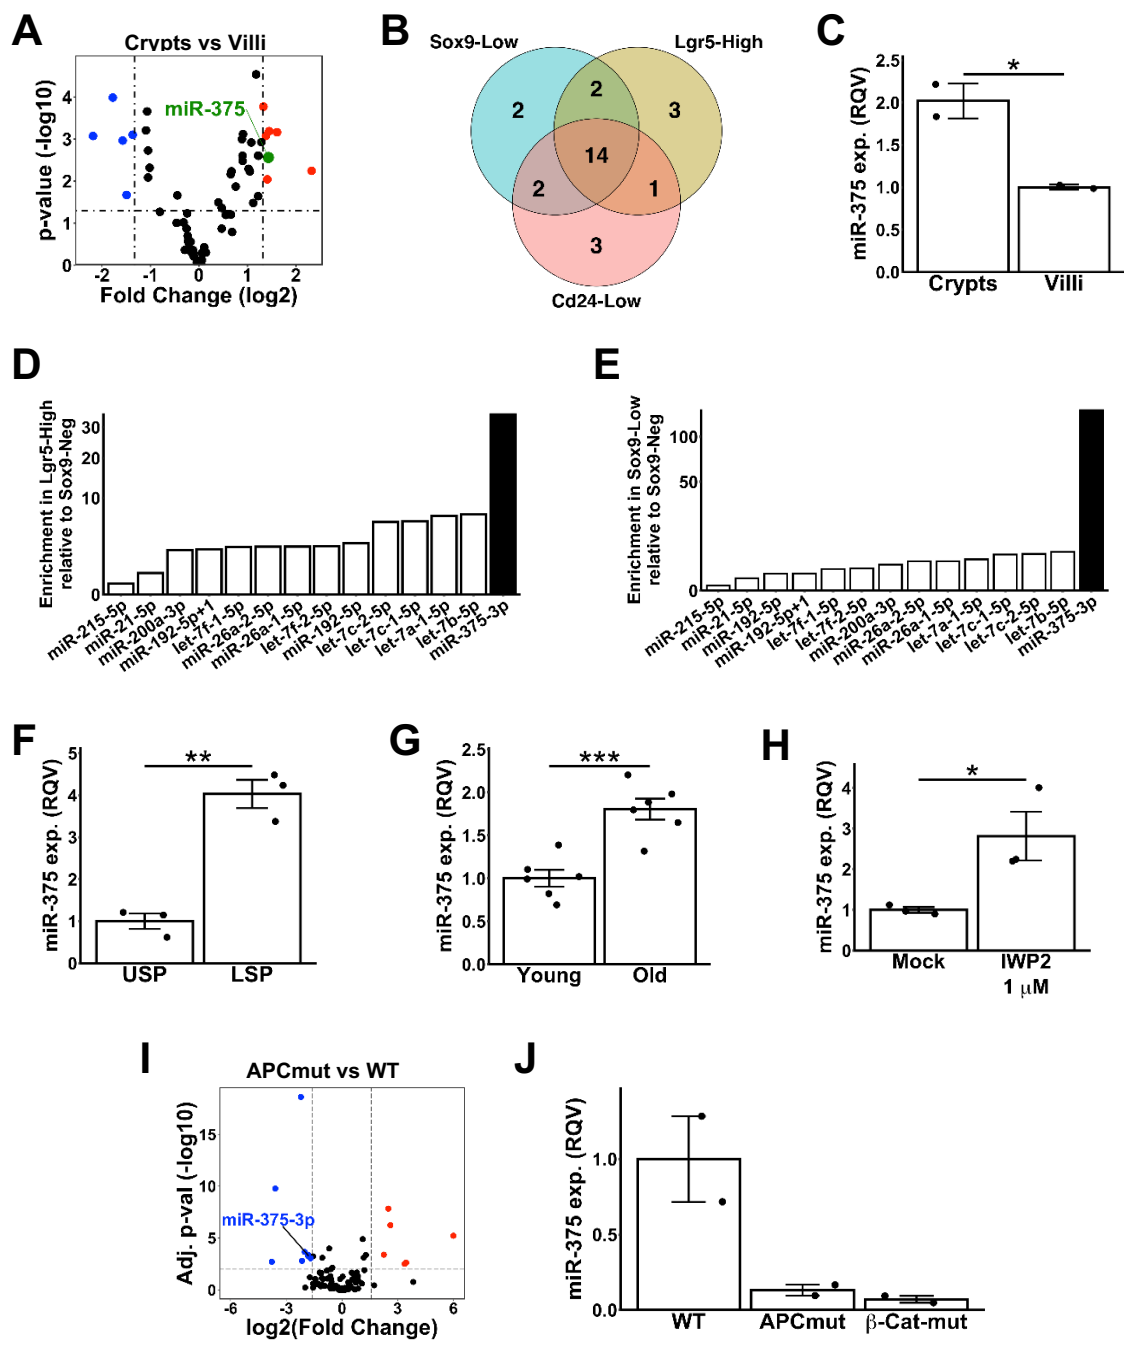

# Figure 2

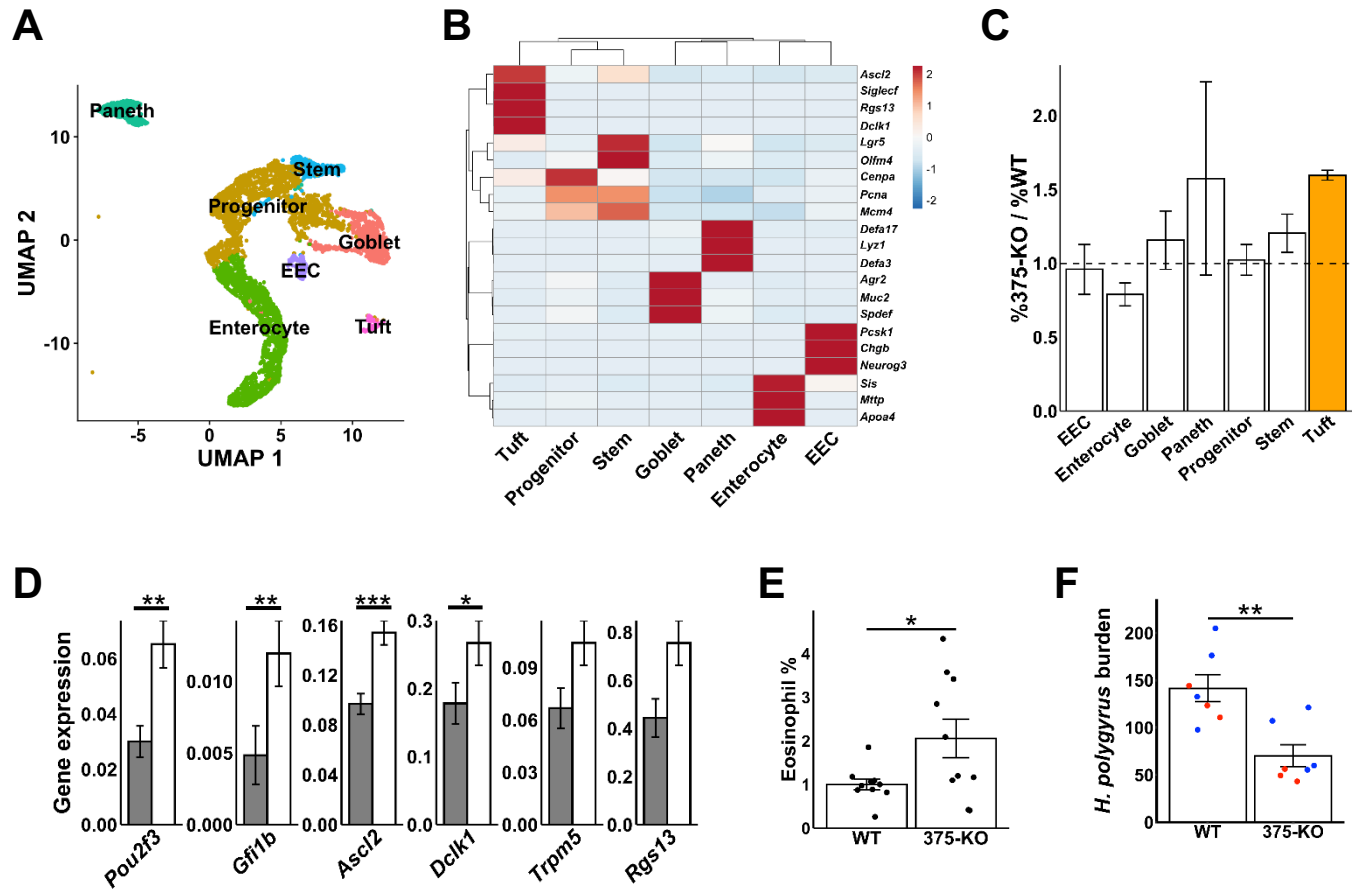



**Figure 3**

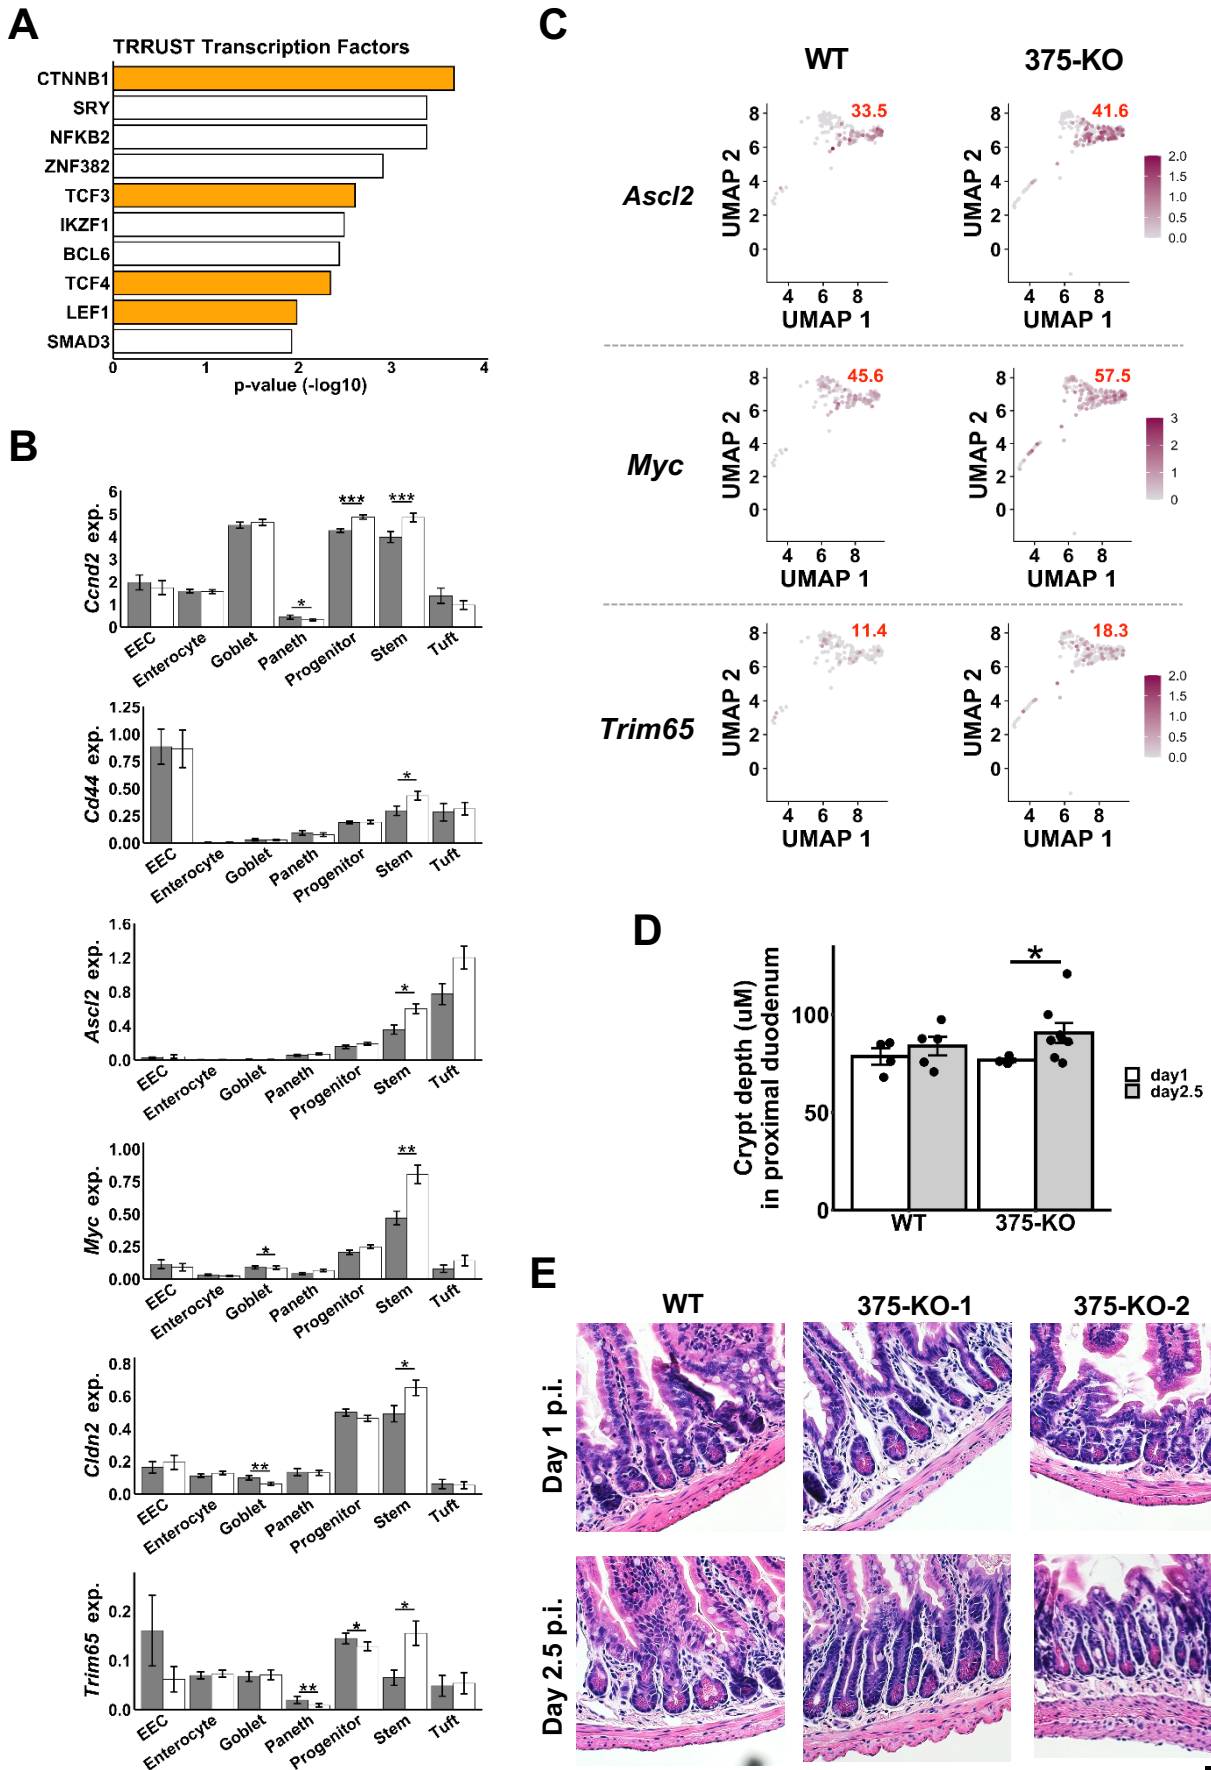

**Figure 4**

**A**

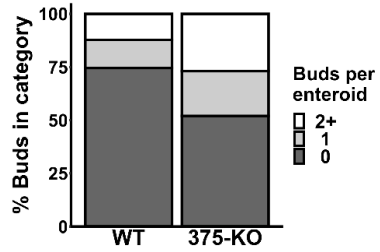

**B**

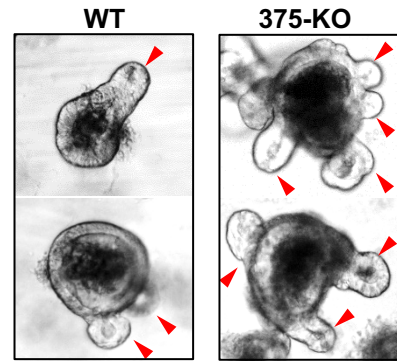

**C**

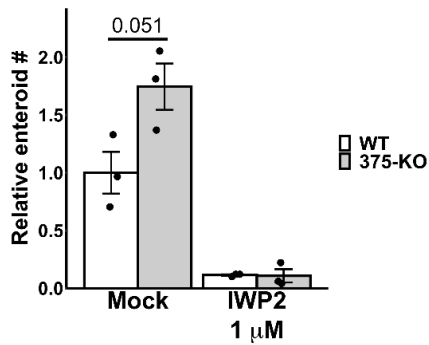

**D**

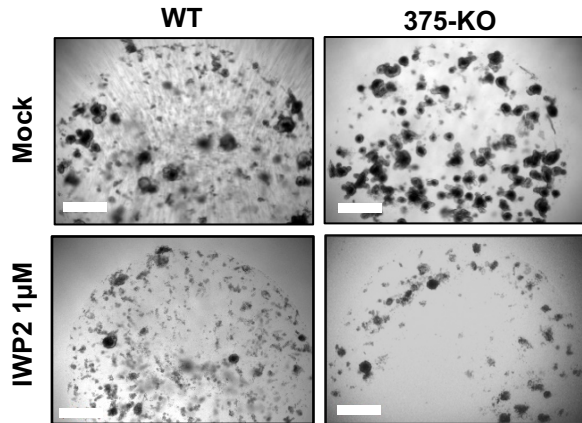

**E**

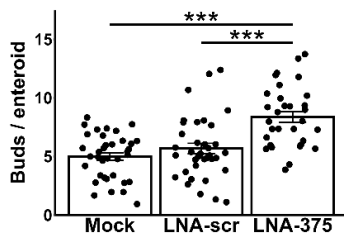

**F**

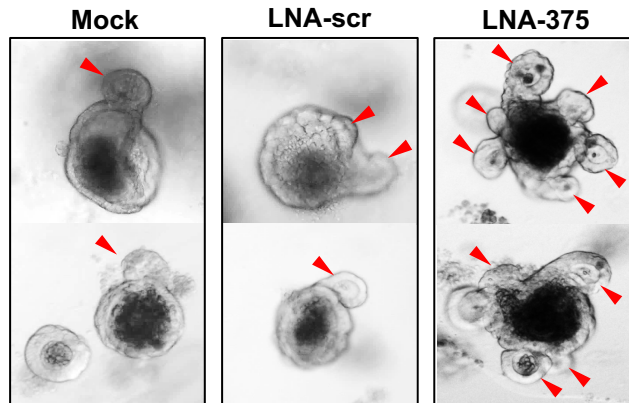

**G**

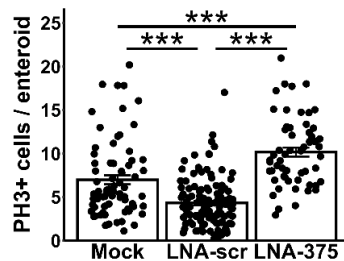

**H**

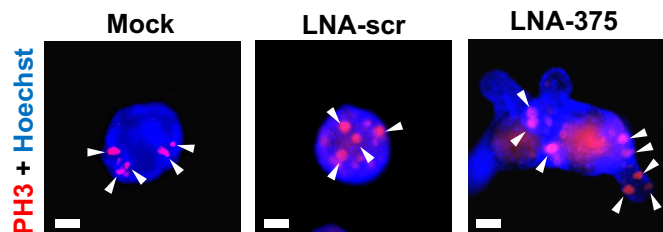

# Figure 5

**A**

hsa-miR-375-3p 5'-UUUGUUCGUUCGGCUCGCGUGA-3'  
mmu-miR-375-3p 5'-UUUGUUCGUUCGGCUCGCGUGA-3'  
ssc-miR-375 5'-UUUGUUCGUUCGGCUCGCGUGA-3'  
dme-miR-375-3p 5'-UUUGUUCGUUUGGCUUAAGUUA-3'

**B**

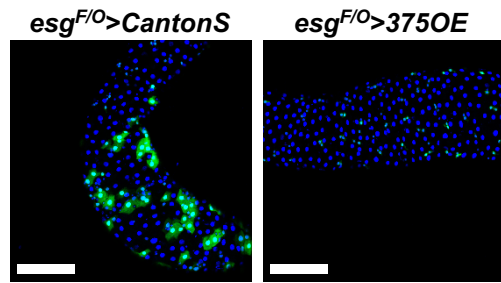

**C**

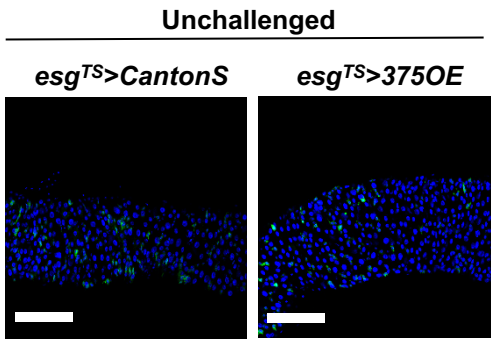

**D**

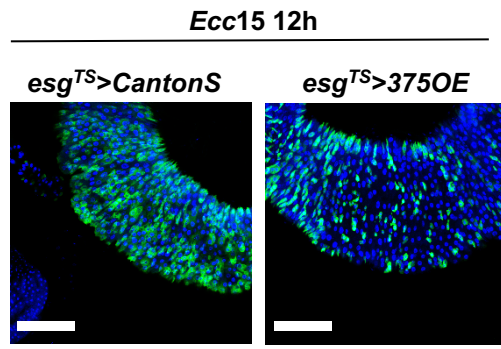

**E**

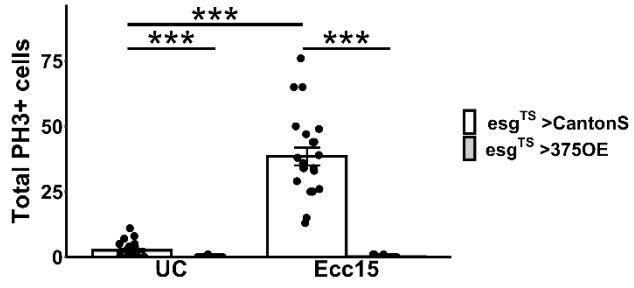

Figure 6

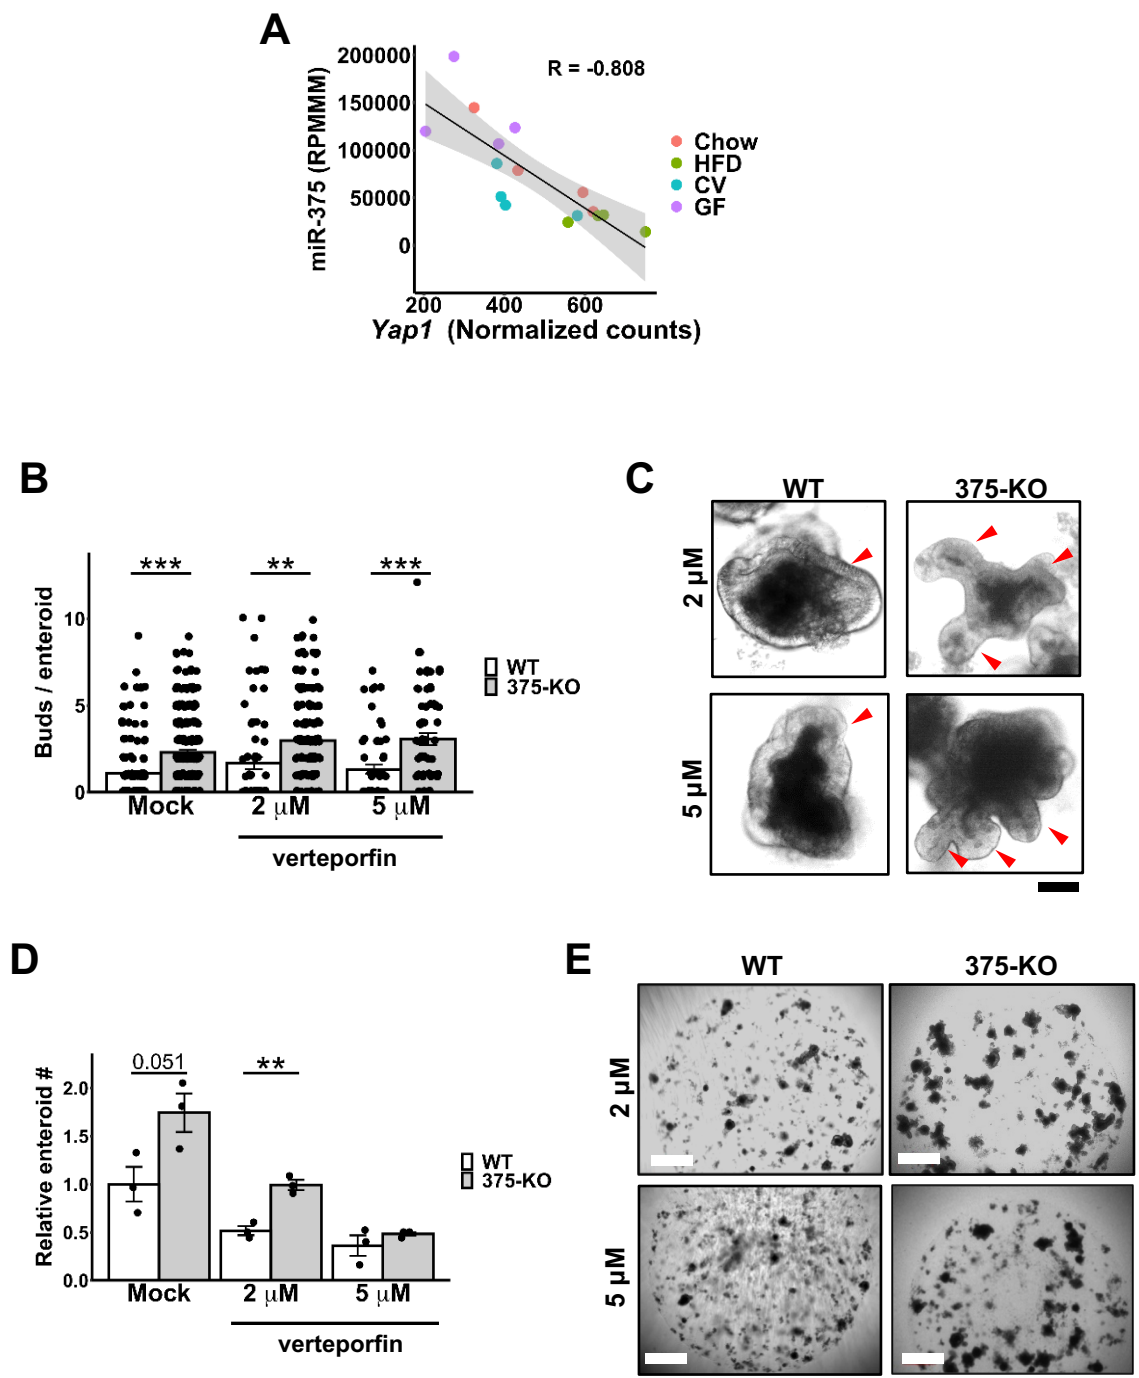

# Figure 7

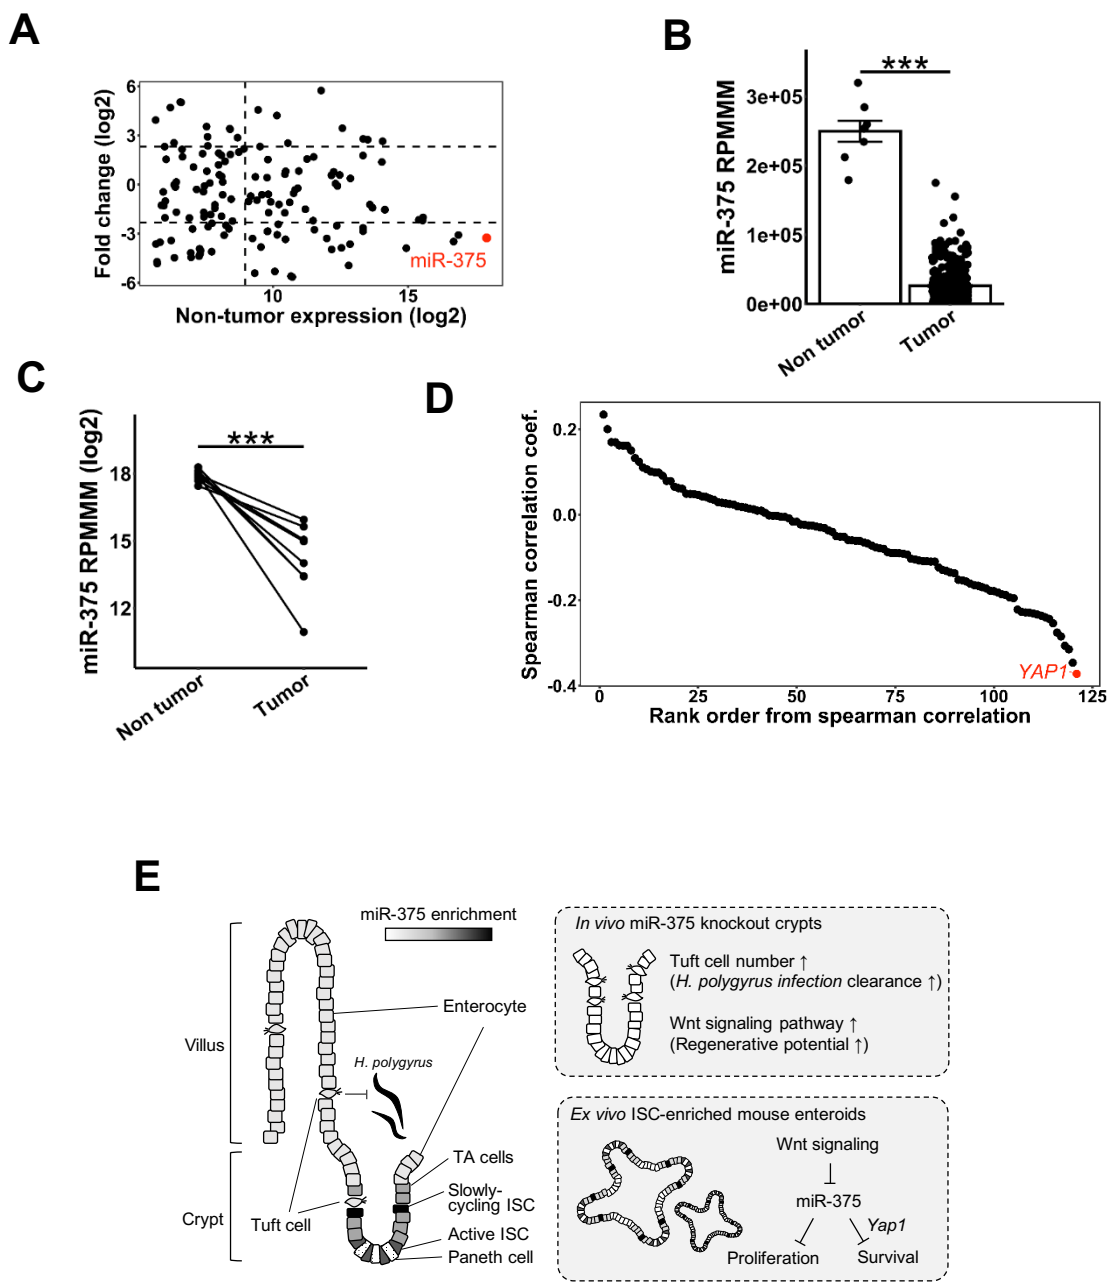

Source: https://biorxiv.org/content/10.1101/2020.10.01.321612v1.full.pdf
